# Supplementary material for: A cell-based fascin bioassay identifies compounds with potential anti-metastasis or cognition-enhancing functions
Source: PubMed Central journal article supplement — Dis Model Mech. 2012 Aug 23;6(1):217–35. doi: 10.1242/dmm.008243 (PMC3529353; doi:10.1242/dmm.008243), 2012-08-23
Supplement: supp_008243_DMM008243.pdf [file supp_008243_DMM008243.pdf]

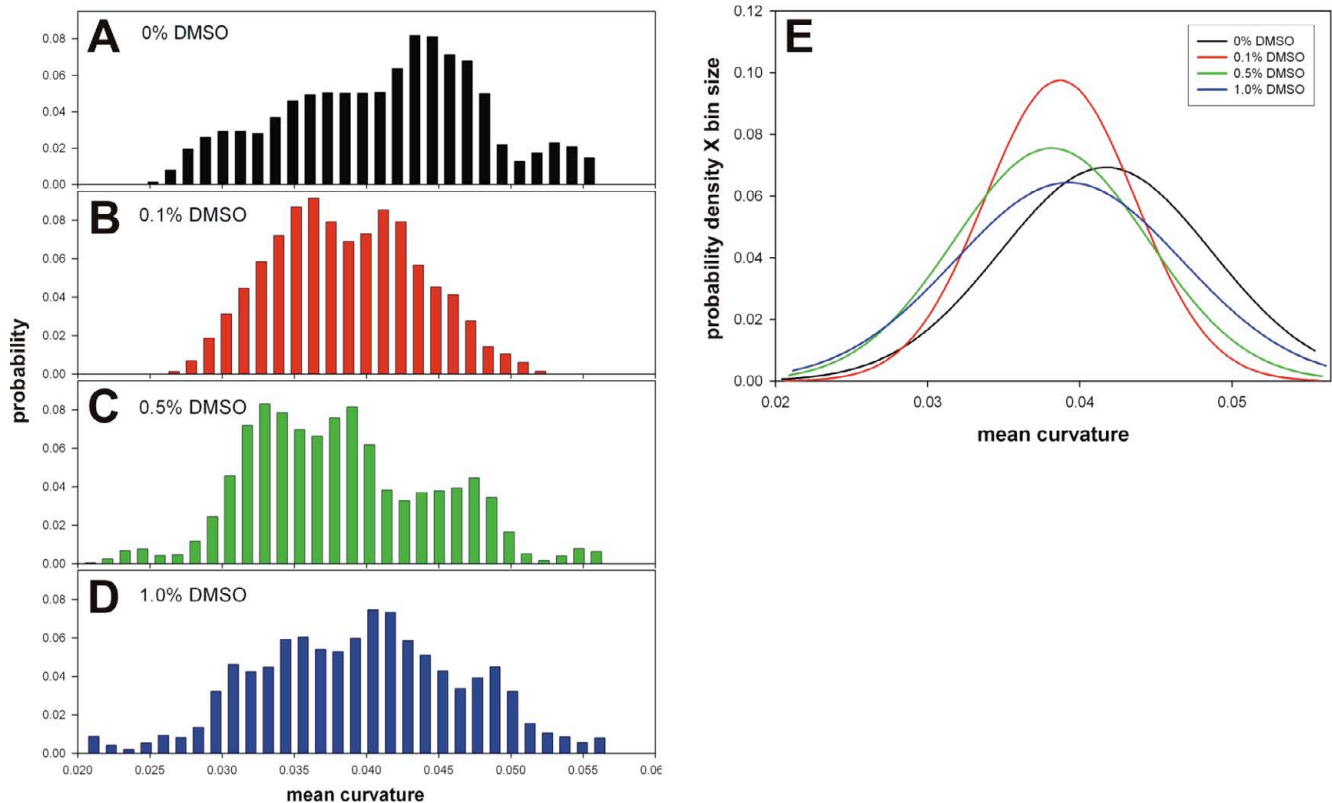

**Supplemental Figure 1 (Fig. S1).** Effect of DMSO on neurite curvature of cultured *Drosophila* larval neurons. Curvature profiles of populations of cultured mushroom body (MB) gamma neurons from fascin-deficient  $sn^3/sn^3$  mutant larval CNS. Dissociated neurons from a single CNS were distributed into four culture dishes, each of which was cultured with a different DMSO concentration (0%, 0.1%, 0.5%, or 1.0%) for three days. Gamma neurons were identified using  $201Y-GAL4$  and  $UAS-lacZ$ , i.e., based on positive labeling with anti- $\beta$ gal. Approximately 45 MB gamma neurons were sampled from each dish. Mean curvature for each neuron was calculated from skeletonized images of neurite arbors as described in Kraft et al., 2006, *J. Neurosci.* 26:8734-8747. (A-D) Frequency distributions of mean curvature values for larval MB gamma neurons. The histograms were plotted with soft binning to mitigate the effects of discretization error (see Methods). (A) 0% DMSO. (B) 0.1% DMSO. (C) 0.5% DMSO. (D) 1.0% DMSO. (E) Four scaled normal-distribution curves that were fitted to the data used to generate the histograms in panels A-D. By multiplying the probability density by the bin size, the ordinate axis is scaled to that of the histograms. Each color represents a different concentration of DMSO, as indicated in the legend.

Kraft et al.

Figure S2.  
Chemical structures of  
fascin-pathway modifiers.

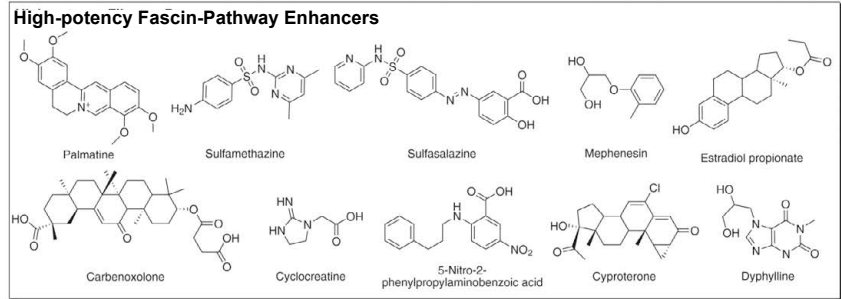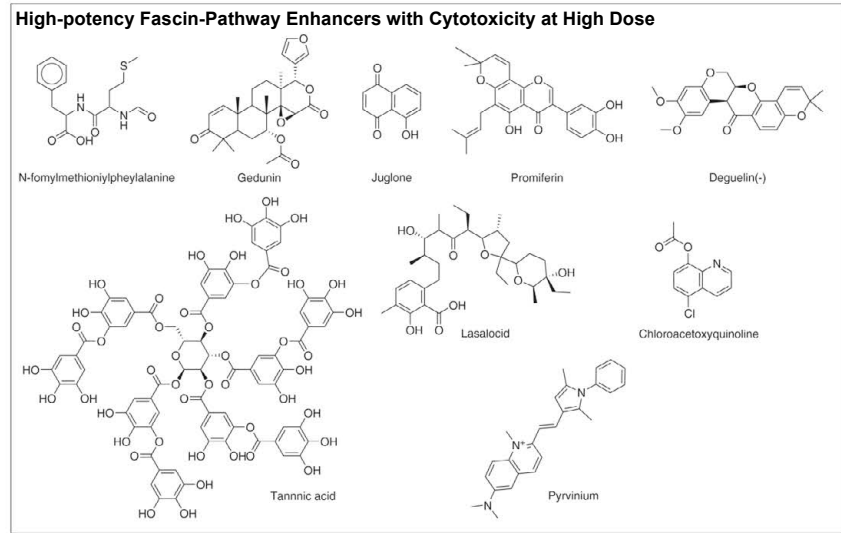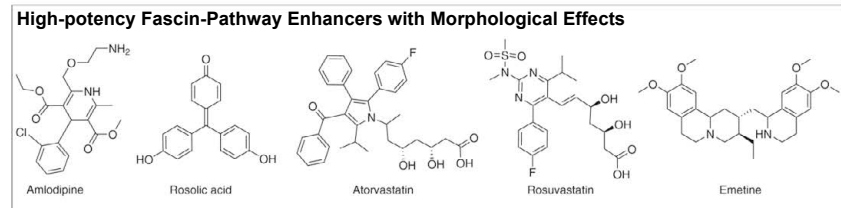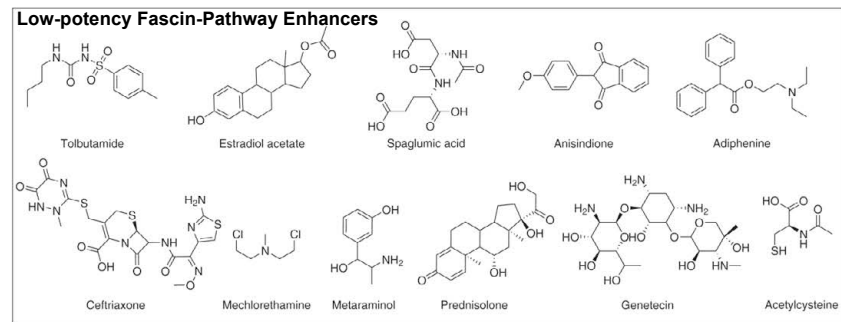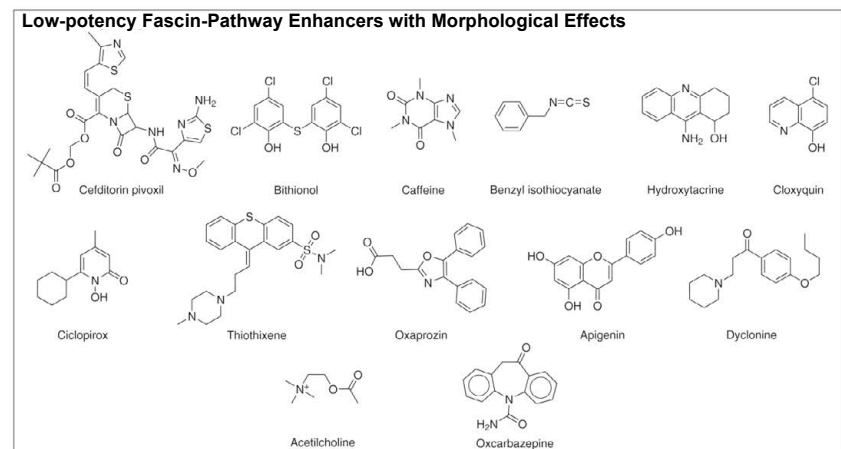

Fig. S2, *continued*.  
**Chemical structures of  
 fascin-pathway modifiers.**

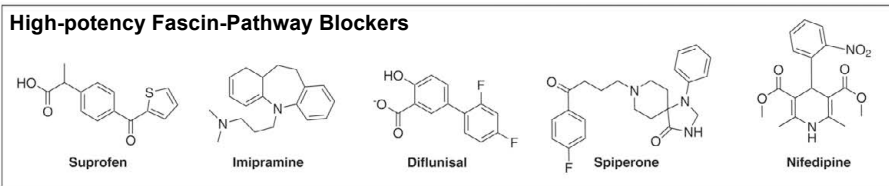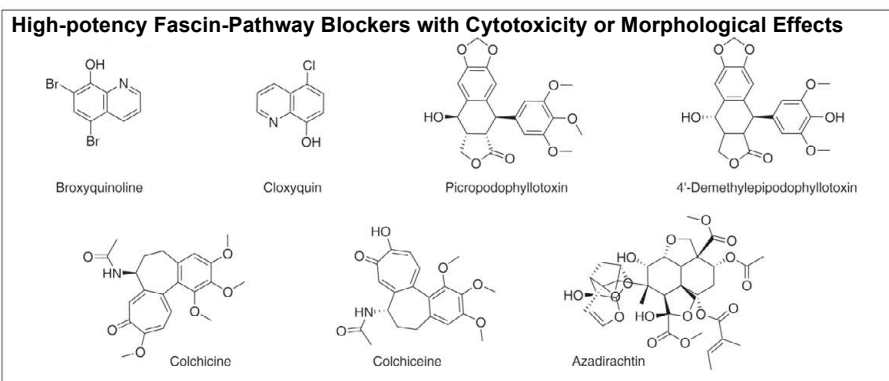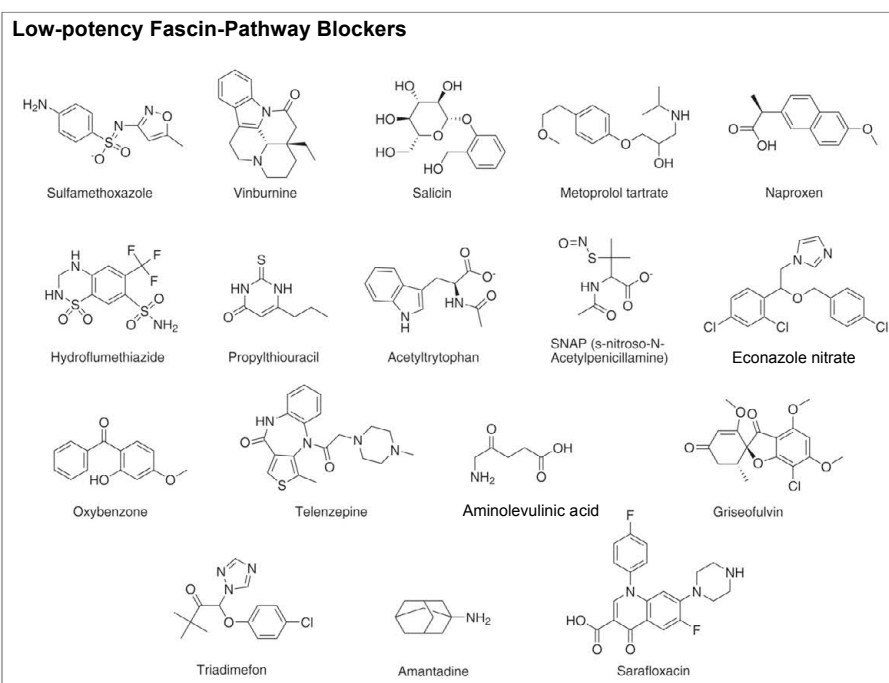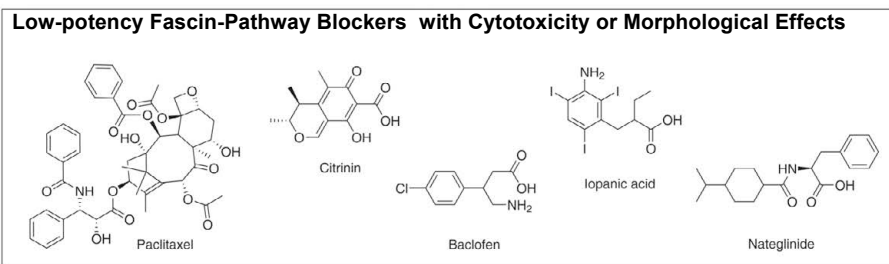

Source:  
MicroSource Discovery Systems, Inc.

Kraft et al., TableS1  
NINDS Custom Collection II  
Compound Library

Yellow: Fascin-pathway enhancer  
Blue: Fascin-pathway blocker  
Green: Both

| COMPOUND NAME                                       | Chemical Abstract Service (CAS) # | FORMULA     | MW     | STATUS        |
|-----------------------------------------------------|-----------------------------------|-------------|--------|---------------|
| 1-(2-METHOXYPHENYL)PIRAZINE HYDROCHLORIDE           |                                   | C11H17ClN2O | 228.72 | experimental  |
| 1,2-DIMETHYLHYDRAZINE HYDROCHLORIDE                 | 306-37-6                          | C2H10Cl2N2  | 133.02 | experimental  |
| 1,3-DIPROPYL-8-CYCLOPENTYLXANTHINE [DPCPX]          |                                   | C16H24N4O2  | 304.40 | experimental  |
| 18alpha-GLYCYRRHETINIC ACID                         |                                   | C30H46O4    | 470.70 | experimental  |
| 1-BENZYLOXYCARBONYLAMINOPHENETHYL CHLOROMETHYL      | 26049-94-5                        | C18H18ClNO3 | 331.80 | experimental  |
| 1-METHYLXANTHINE                                    | 6136-37-4                         | C6H6N4O2    | 166.14 | experimental  |
| 1-PHENYLBIGUANIDE HYDROCHLORIDE                     | 55-57-2                           | C8H12ClN5   | 213.67 | experimental  |
| 1R,2S-PHENYLPROPYLAMINE                             | 14838-15-4                        | C9H13NO     | 151.21 | experimental  |
| 1R,9S-HYDRASTINE                                    | 118-08-1                          | C21H21NO6   | 383.40 | experimental  |
| 1R-CAMPHOR                                          | 464-49-3; 76-22-2                 | C10H16O     | 152.24 | USP, JAN      |
| 1S,2R-PHENYLPROPANOLAMINE HYDROCHLORIDE             | 37577-28-9                        | C9H14ClNO   | 187.67 | experimental  |
| 2-(2,6-DIMETHOXYPHENOXYETHYL)AMINOMETHYL-1,4-       |                                   | C19H24ClNO5 | 381.86 | experimental  |
| 2,3-DIHYDROXY-6,7-DICHLOROQUINOXALINE               |                                   | C8H4Cl2N2O2 | 231.04 | experimental  |
| 2,6-DI-t-BUTYL-4-METHYLPHENOL                       | 128-37-0                          | C15H24O     | 220.36 | experimental  |
| 2-MERCAPTOBENZOTHAZOLE                              | 149-30-4                          | C7H5NS2     | 167.25 | experimental  |
| 2-THIOURACIL                                        | 141-90-2                          | C4H4N2OS    | 128.15 | BP-1948       |
| 3,3'-DIINDOLYLMETHANE                               | 1968-05-4                         | C17H14N2    | 246.31 | experimental  |
| 3,5-DINITROCATÉCHOL (OR-486)                        |                                   | C6H4N2O6    | 200.11 | experimental  |
| 3-AMINOPROPANESULPHONIC ACID                        | 3687-18-1                         | C3H9NO3S    | 139.17 | experimental  |
| 3-ISOBUTYL-1-METHYLXANTHINE (IBMX)                  | 28822-58-4                        | C10H14N4O2  | 222.25 | experimental  |
| 3-METHYL-1-PHENYL-2-PYRAZOLIN-5-ONE (MCI-186)       |                                   | C10H10N2O   | 174.20 | experimental  |
| 3-METHYLXANTHINE                                    | 1076-22-8                         | C6H6N4O2    | 166.14 | experimental  |
| 4'-DEMETHYLEPIPODOPHYLLOTOXIN                       |                                   | C21H20O8    | 400.39 | experimental  |
| 4-NAPHTHALIMIDOBUTYRIC ACID                         |                                   | C16H13NO4   | 283.29 | experimental  |
| 5-AMINOPENTANOIC ACID HYDROCHLORIDE                 |                                   | C5H12ClNO2  | 153.61 | experimental  |
| 5-CHLOROINDOLE-2-CARBOXYLIC ACID                    | 10517-21-2                        | C9H6ClNO2   | 195.61 | experimental  |
| 5-FLUORO-5'-DEOXYURIDINE                            | 3094-09-5                         | C9H11FN2O5  | 246.20 | experimental  |
| 5-FLUOROINDOLE-2-CARBOXYLIC ACID                    | 399-76-8                          | C9H6FNO2    | 179.15 | experimental  |
| 5-NITRO-2-(3-PHENYLPROPYLAMINO)-BENZOIC ACID [NPPB] |                                   | C16H16N2O4  | 300.32 | experimental  |
| 6,7-DICHLORO-3-HYDROXY-2-QUINOXALINECARBOXYLIC ACID |                                   | C9H4Cl2N2O3 | 259.05 | experimental  |
| 6alpha-METHYLPREDNISOLONE ACETATE                   |                                   | C24H32O6    | 416.52 | experimental  |
| 6-AMINOCAPROIC ACID                                 | 60-32-2                           | C6H13NO2    | 131.18 | USP, INN, BAN |
| 6-AMINONICOTINAMIDE                                 | 329-89-5                          | C6H7N3O     | 137.14 | experimental  |
| 7-CHLOROKYNURENIC ACID                              |                                   | C10H6ClNO3  | 223.62 | experimental  |
| 7-NITROINDAZOLE                                     | 2942-42-9                         | C7H5N3O2    | 163.14 | experimental  |
| 8-CYCLOPENTYLTHEOPHYLLINE                           |                                   | C12H16N4O2  | 248.29 | experimental  |
| 9-AMINO-1,2,3,4-TETRAHYDROACRIDINE HYDROCHLORIDE    |                                   | C13H15ClN2  | 234.73 | experimental  |
| ABRINE (L)                                          | 526-31-8                          | C12H14N2O2  | 218.26 | experimental  |

Source:  
MicroSource Discovery Systems, Inc.

Kraft et al., TableS1  
NINDS Custom Collection II  
Compound Library

Yellow: Fascin-pathway enhancer  
Blue: Fascin-pathway blocker  
Green: Both

|                                    |                                  |                |        |                    |
|------------------------------------|----------------------------------|----------------|--------|--------------------|
| ACEBUTOLOL HYDROCHLORIDE           | 34381-68-5, 37517-30-9           | C18H29CIN2O4   | 372.90 | USAN, INN, BAN     |
| ACETAMINOPHEN                      | 103-90-2                         | C8H9NO2        | 151.17 | USP, INN, BAN      |
| ACETAMINOSALOL                     | 118-57-0                         | C15H13NO4      | 271.28 | INN                |
| ACETANILIDE                        | 103-84-4                         | C8H9NO         | 135.17 | NF                 |
| ACETAZOLAMIDE                      | 59-66-5                          | C4H6N4O3S2     | 222.25 | USP, INN, BAN, JAN |
| ACETOHYDROXAMIC ACID               | 546-88-3                         | C2H5NO2        | 75.07  | USP, INN           |
| ACETOSYRINGONE                     | 2478-38-8                        | C10H12O4       | 196.20 | experimental       |
| ACETYL TYROSINE ETHYL ESTER        |                                  | C13H17NO4      | 251.28 | experimental       |
| ACETYLCARNITINE                    | 3040-38-8                        | C8H16CINO4     | 225.67 | experimental       |
| ACETYLCHOLINE                      | 60-31-1, 51-84-3 [acetylcholine] | C7H16CINO2     | 181.66 | USP                |
| ACETYLCYSTEINE                     | 616-91-1                         | C5H9NO3S       | 163.20 | USP, INN, BAN, JAN |
| ACETYLGLUCOSAMINE                  |                                  | C8H15NO6       | 221.21 | experimental       |
| ACETYLGLUTAMIC ACID                |                                  | C7H11NO5       | 189.17 | experimental       |
| ACETYL-L-LEUCINE                   | 99-15-0                          | C8H15NO3       | 173.21 | INN                |
| ACETYLTRYPTOPHAN                   | 1218-34-4                        | C13H14N2O3     | 246.27 | experimental       |
| ACETYLTRYPTOPHANAMIDE              |                                  | C13H15N3O2     | 245.28 | experimental       |
| ACEXAMIC ACID                      | 57-08-9                          | C8H15NO3       | 173.21 | INN, BAN           |
| ACIVICIN                           | 42228-92-2                       | C5H7CIN2O3     | 178.58 | USAN, INN          |
| ACONITINE                          | 302-27-2                         | C34H47NO11     | 645.75 | BP-1934            |
| ACRIFLAVINIUM HYDROCHLORIDE        | 8018-07-3                        | C14H14CIN3     | 259.74 | INN, NF-X          |
| ACRISORCIN                         | 7527-91-5                        | C25H28N2O2     | 388.51 | USP-XXII, INN      |
| ACYCLOVIR                          | 59277-89-3                       | C8H11N5O3      | 225.21 | USP, INN, BAN, JAN |
| ADENOSINE                          | 58-61-7                          | C10H13N5O4     | 267.25 | USP, BAN           |
| ADIPHENINE HYDROCHLORIDE           | 50-42-0, 64-95-9 [adiphenine]    | C20H26CINO2    | 347.89 | USAN, INN          |
| ADRENALINE BITARTRATE              | 51-42-3                          | C13H19NO9      | 333.30 | USP, JAN           |
| AESCULIN                           | 531-75-9                         | C15H16O9       | 340.29 | experimental       |
| AGMATINE SULFATE                   | 2482-00-0                        | C5H16N4O4S     | 228.27 | experimental       |
| AJMALINE                           | 4360-17-7                        | C20H26N2O2     | 326.44 | JAN                |
| AKLAVINE HYDROCHLORIDE             | 60504-57-6 (aklavine)            | C30H36CINO10   | 606.08 | experimental       |
| AKLOMIDE                           | 3011-89-0                        | C7H5CIN2O3     | 200.58 | USAN, INN, BAN     |
| ALAPROCLATE                        | 60719-82-6                       | C13H18CINO2    | 255.75 | USAN, INN          |
| ALEXIDINE HYDROCHLORIDE            | 22573-93-9, 22782-69-0           | C26H58CI2N10   | 581.73 | experimental       |
| ALFLUZOCIN                         | 81403-80-7                       | C19H27N5O4     | 389.46 | USAN, INN, BAN     |
| ALLANTOIN                          | 97-59-6                          | C4H6N4O3       | 158.12 | USP, BAN, JAN      |
| ALLOPURINOL                        | 315-30-0                         | C5H4N4O        | 136.11 | USP, INN, BAN, JAN |
| ALLOXAN                            | 2244-11-3                        | C4H2N2O4       | 142.07 | experimental       |
| ALMOTRIPTAN                        | 154323-57-6                      | C17H25N3O2S    | 335.47 | USAN, INN, BAN     |
| alpha-CYANO-3-HYDROXYCINNAMIC ACID |                                  | C10H7NO3       | 189.17 | experimental       |
| alpha-TOCHOPHERYL ACETATE          | 58-95-7                          | C31H52O3       | 472.76 | USP                |
| ALTHIAZIDE                         | 5588-16-9                        | C11H14CIN3O4S3 | 383.90 | USAN, INN          |
| ALTRETAMINE                        | 645-05-6                         | C9H18N6        | 210.28 | USP, INN, BAN      |

Source:  
MicroSource Discovery Systems, Inc.

Kraft et al., TableS1  
NINDS Custom Collection II  
Compound Library

Yellow: Fascin-pathway enhancer  
Blue: Fascin-pathway blocker  
Green: Both

|                                   |                                |                |        |                     |
|-----------------------------------|--------------------------------|----------------|--------|---------------------|
| ALVERINE CITRATE                  | 5560-59-8, 150-59-4 [alverine] | C26H35NO7      | 473.57 | USAN, INN, BAN      |
| AMANTADINE HYDROCHLORIDE          | 665-66-7, 768-94-5             | C10H18ClN      | 187.71 | USP, INN, BAN       |
| AMBROXOL HYDROCHLORIDE            | 23828-92-4, 18683-91-5         | C13H19Br2ClN2O | 414.57 | INN, BAN, JAN       |
| AMCINONIDE                        | 51022-69-6                     | C28H35FO7      | 502.59 | USP, INN, BAN, JAN  |
| AMIKACIN SULFATE                  | 39831-55-5, 37517-28-5         | C22H47N5O21S2  | 781.77 | USP, JAN            |
| AMILORIDE HYDROCHLORIDE           | 17440-83-4, 2016-88-8          | C6H9Cl2N7O     | 266.09 | USP, INN, BAN       |
| AMINACRINE                        | 90-45-9, 134-50-9 [aminacrine] | C13H10N2       | 194.24 | USAN, IN, BAN       |
| AMINOCYCLOPROPANECARBOXYLIC ACID  | 68781-13-5                     | C4H7NO2        | 101.11 | experimental        |
| AMINOGLUTETHIMIDE                 | 125-84-8                       | C13H16N2O2     | 232.28 | USP, INN, BAN       |
| AMINOHIPURIC ACID                 | 61-78-9, 94-16-6               | C9H10N2O3      | 194.19 | USP                 |
| AMINOHYDROXYBUTYRIC ACID          | 924-49-2                       | C4H9NO3        | 119.12 | JAN                 |
| AMINOLEVULINIC ACID HYDROCHLORIDE | 5451-09-2                      | C5H10ClNO3     | 167.59 | USAN                |
| AMINOPHENAZONE                    | 83-07-8, 747-30-8              | C11H13N3O      | 203.25 | INN                 |
| AMINOPTERIN                       | 54-62-6, 58602-66-7            | C19H20N8O5     | 440.42 | INN, BAN            |
| AMINOPYRIDINE                     | 504-24-5                       | C5H6N2         | 94.12  | experimental        |
| AMINOSALICYLATE SODIUM            | 6018-19-5                      | C7H6NNaO3      | 175.12 | USP                 |
| AMINOTHIAZOLE                     | 96-50-4                        | C3H4N2S        | 100.14 | INN                 |
| AMIODARONE HYDROCHLORIDE          | 1951-25-3                      | C25H30Cl2N2O3  | 681.78 | USAN, INN, BAN, JAN |
| AMIPRILOSE                        | 56824-20-5, 60414-06-4         | C14H28ClNO6    | 341.84 | USAN, INN           |
| AMITRAZ                           | 33089-61-1                     | C19H23N3       | 293.42 | USP, INN, BAN       |
| AMITRIPTYLINE HYDROCHLORIDE       | 549-18-8, 50-48-6              | C20H24ClN      | 313.87 | USP, INN, BAN, JAN  |
| AMLODIPINE BESYLATE               | 111470-99-6                    | C26H31ClN2O8S  | 567.06 | USAN, INN, BAN, JAN |
| AMODIAQUINE DIHYDROCHLORIDE       | 6398-98-7, 69-44-3             | C20H24Cl3N3O   | 428.79 | USP, INN, BAN       |
| AMOXAPINE                         | 14028-44-5                     | C17H16ClN3O    | 313.79 | USP, INN, BAN, JAN  |
| AMOXICILLIN                       | 61336-70-7, 26787-78-0         | C16H19N3O5S    | 365.41 | USP, INN, BAN, JAN  |
| AMPHOTERICIN B                    | 1397-89-3                      | C47H73NO17     | 924.10 | USP, INN, BAN, JAN  |
| AMPICILLIN SODIUM                 | 69-52-3, 69-53-4 [ampicillin]  | C16H18N3NaO4S  | 371.39 | USP, INN, BAN, JAN  |
| AMPROLIUM                         | 121-25-5                       | C14H20Cl2N4    | 315.25 | USP, INN, BAN       |
| AMYGDALIN                         | 29883-15-6                     | C20H27NO11     | 457.44 | experimental        |
| ANDROSTERONE SODIUM SULFATE       |                                | C19H29NaO5S    | 392.49 | experimental        |
| ANISINDIONE                       | 117-37-3                       | C16H12O3       | 252.27 | NF-XIII, INN, BAN   |
| ANISODAMINE                       | 17659-49-3                     | C17H23NO4      | 305.38 | experimental        |
| ANISOMYCIN                        | 22862-76-6                     | C14H19NO4      | 265.31 | experimental        |
| ANTAZOLINE PHOSPHATE              | 154-68-7, 91-75-8 [antazoline] | C17H22N3O4P    | 363.36 | USP                 |
| ANTHRALIN                         | 480-22-8, 1143-38-0            | C14H10O3       | 226.23 | USP                 |
| ANTHRAQUINONE                     | 84-65-1                        | C14H8O2        | 208.22 | experimental        |
| ANTIPYRINE                        | 60-80-0                        | C11H12N2O      | 188.23 | USP, INN, BAN, JAN  |
| APIGENIN                          | 520-36-5                       | C15H10O5       | 270.24 | experimental        |
| APOMORPHINE HYDROCHLORIDE         | 41372-20-7, 314-19-2           | C17H18ClNO2    | 303.79 | USP, BAN            |
| APRAMYCIN                         | 37321-09-8                     | C21H41N5O11    | 539.59 | USAN, INN, BAN      |
| ARECOLINE HYDROBROMIDE            | 300-08-3, 63-75-2 [arecoline]  | C8H14BrNO2     | 236.11 | NF-XIII             |

Source:  
MicroSource Discovery Systems, Inc.

Kraft et al., TableS1  
NINDS Custom Collection II  
Compound Library

Yellow: Fascin-pathway enhancer  
Blue: Fascin-pathway blocker  
Green: Both

|                             |                                  |                |         |                         |
|-----------------------------|----------------------------------|----------------|---------|-------------------------|
| ARTEMISININ                 | 63968-64-9                       | C15H22O5       | 282.34  | INN                     |
| ASPARTAME                   | 22839-47-0                       | C14H18N2O5     | 294.31  | NF, INN, BAN            |
| ASPIRIN                     | 50-78-2                          | C9H8O4         | 180.16  | USP, BAN, JAN           |
| ASTEMIZOLE                  | 68844-77-9                       | C28H31FN4O     | 458.58  | USP, INN, BAN, JAN      |
| ATENOLOL                    | 29122-68-7                       | C14H22N2O3     | 266.34  | USP, INN, BAN, JAN      |
| ATORVASTATIN CALCIUM        | 134523-03-8, 134523-00-5         | C33H33CaFNO5   | 582.71  | USAN, INN, BAN          |
| ATOVAQUONE                  | 95233-18-4                       | C22H19ClO3     | 366.85  | USP, INN, BAN           |
| ATRACTYLOSIDE POTASSIUM     | 17754-44-8(acid)                 | C30H44K2O16S2  | 803.01  | experimental            |
| ATROPINE                    | 51-55-8, 5908-99-6 [atropine]    | C17H25NO7S     | 387.46  | USP, BAN                |
| AVOBENZONE                  | 70356-09-1                       | C20H22O3       | 310.40  | USP, INN                |
| AVOCADYNE                   | 34524-38-4                       | C17H32O3       | 284.44  | experimental            |
| AVOCADYNONE ACETATE         | 24607-10-1                       | C19H32O4       | 324.46  | experimental            |
| AZACITIDINE                 | 320-67-2                         | C8H12N4O5      | 244.21  | USAN, INN               |
| AZADIRACHTIN                | 11141-17-6                       | C35H44O16      | 720.73  | experimental            |
| AZAPERONE                   | 1649-18-9                        | C19H22FN3O     | 327.41  | USP, INN, BAN           |
| AZASERINE                   | 115-02-6                         | C5H7N3O4       | 173.13  | USAN, INN               |
| AZATHIOPRINE                | 446-86-6                         | C9H7N7O2S      | 277.27  | USP, INN, BAN, JAN      |
| AZELAIC ACID                | 123-99-9                         | C9H16O4        | 188.23  | USAN, INN               |
| AZELASTINE HYDROCHLORIDE    | 58581-89-8                       | C22H25Cl2N3O   | 418.37  | USAN, INN, BAN, JAN     |
| AZITHROMYCIN                | 83905-01-5, 117772-70-0          | C38H72N2O12    | 749.00  | USP, INN, BAN           |
| AZLOCILLIN SODIUM           | 37091-66-0                       | C20H22N5NaO6S  | 483.48  | USAN, INN, BAN          |
| AZOBENZENE                  | 103-33-3                         | C12H10N2       | 182.23  | experimental            |
| BACAMPICILLIN HYDROCHLORIDE | 37661-08-8, 50972-17-3           | C21H28ClN3O7S  | 501.99  | USP, INN, BAN, JAN      |
| BACITRACIN                  | 1405-87-4                        | C66H103N17O16S | 1422.73 | USP, INN, BAN, JAN      |
| BACLOFEN                    | 1134-47-0                        | C10H12ClNO2    | 213.67  | USP, INN, BAN, JAN      |
| BAICALEIN                   | 491-67-8                         | C15H10O5       | 270.24  | experimental            |
| BENAZEPRIL HYDROCHLORIDE    | 86541-74-4                       | C24H29ClN2O5   | 460.96  | USAN, INN, BAN, JAN     |
| BENDROFUMETHIAZIDE          | 73-48-3                          | C15H14F3N3O4S2 | 421.42  | USP, INN, BAN, JAN      |
| BENFLUOREX HYDROCHLORIDE    | 23602-78-0                       | C19H21ClF3NO2  | 387.83  | INN, BAN                |
| BENSERAZIDE HYDROCHLORIDE   | 322-35-0                         | C10H16ClN3O5   | 293.71  | USAN, INN, BAN, JAN     |
| BENZALKONIUM CHLORIDE       | 8001-54-5                        | C22H40ClN      | 354.02  | NF, INN, BAN, JAN       |
| BENZANTHRONE                | 82-05-3                          | C17H10O        | 230.27  | experimental            |
| BENZETHONIUM CHLORIDE       | 121-54-0                         | C27H42ClNO2    | 448.09  | USP, INN, BAN, JAN      |
| BENZOCAINE                  | 94-09-7                          | C9H11NO2       | 165.19  | USP, INN, BAN           |
| BENZTHIAZIDE                | 91-33-8                          | C15H14ClN3O4S3 | 431.94  | USP-XIII, INN, BAN, JAN |
| BENZTROPINE                 | 132-17-2, 86-13-5 [benztropine]  | C21H27NO5S     | 405.52  | USP, INN, BAN, JAN      |
| BENZYL ISOTHIOCYANATE       | 622-78-6                         | C8H7NS         | 149.22  | INN                     |
| BENZYL PENICILLIN POTASSIUM | 69-57-8, 61-33-6 [penicillin, G] | C16H17KN2O4S   | 372.49  | USP, BAN, JAN           |
| BEPRIDIL HYDROCHLORIDE      | 74764-40-2                       | C24H35ClN2O    | 403.01  | USAN, INN, BAN, JAN     |
| BERBAMINE HYDROCHLORIDE     | 478-61-5 (berbamine)             | C37H42Cl2N2O6  | 681.66  | experimental            |
| BERBERINE CHLORIDE          | 633-65-8, 2086-83-1              | C20H18ClNO4    | 371.82  | JAN                     |

Source:  
MicroSource Discovery Systems, Inc.

Kraft et al., TableS1  
NINDS Custom Collection II  
Compound Library

Yellow: Fascin-pathway enhancer  
Blue: Fascin-pathway blocker  
Green: Both

|                                     |                                 |                       |               |                              |
|-------------------------------------|---------------------------------|-----------------------|---------------|------------------------------|
| BERGAPTEN                           | 484-20-8                        | C12H8O4               | 216.20        | INN                          |
| beta-CAROTENE                       | 7235-40-7                       | C40H56                | 536.89        | USP, INN                     |
| BETAMETHASONE                       | 378-44-9                        | C22H29FO5             | 392.47        | USP, INN, BAN, JAN           |
| BETAMIPRON                          | 3440-28-6                       | C10H11NO3             | 193.20        | INN, JAN                     |
| beta-PELTATIN                       | 518-29-6                        | C22H22O8              | 414.42        | experimental                 |
| BETA-PROPIOLACTONE                  | 57-57-8                         | C3H4O2                | 72.06         | USAN, INN                    |
| BETHANECHOL CHLORIDE                | 590-63-6, 674-38-4              | C7H17CIN2O2           | 196.68        | USP, BAN, JAN                |
| BETULINIC ACID                      | 472-15-1                        | C29H46O3              | 442.69        | experimental                 |
| BEZAFIBRATE                         | 41859-67-0                      | C19H20CINO4           | 361.83        | USAN, INN, BAN, JAN          |
| BIFONAZOLE                          | 60628-96-8                      | C22H18N2              | 310.40        | USAN, INN, BAN, JAN          |
| BIOTIN                              | 58-85-5                         | C10H16N2O3S           | 244.31        | USP, INN, JAN                |
| BISACODYL                           | 603-50-9                        | C22H19NO4             | 361.40        | USP, INN, BAN, JAN           |
| <b>BITHIONOL</b>                    | <b>97-18-7</b>                  | <b>C12H4Cl4Na2O2S</b> | <b>400.02</b> | <b>NF-XII, INN, BAN, JAN</b> |
| BOVINOCIDIN (3-nitropropionic acid) | 504-88-1                        | C3H5NO4               | 119.08        | experimental                 |
| BRETYLIUM TOSYLATE                  | 61-75-6, 59-41-6 [bretylum]     | C18H24BrNO3S          | 414.36        | USP, INN, BAN                |
| BROMHEXINE HYDROCHLORIDE            | 611-75-6, 3572-43-8             | C14H21Br2CIN2         | 412.60        | USAN, INN, BAN, JAN          |
| BROMOPRIDE                          | 4093-35-0                       | C14H22BrN3O2          | 344.25        | INN                          |
| BROMPHENIRAMINE MALEATE             | 980-71-2, 86-22-6               | C20H23BrN2O4          | 435.32        | USP, INN, BAN                |
| <b>BROXYQUINOLINE</b>               | <b>521-74-4</b>                 | <b>C9H5Br2NO</b>      | <b>302.95</b> | <b>INN</b>                   |
| BUCLADESINE                         | 362-74-3                        | C18H24N5O8P           | 469.39        | INN, JAN                     |
| BUDESONIDE                          | 51333-22-3 [11(gr b), 16(gr a)] | C25H34O6              | 430.55        | USAN, INN, BAN, JAN          |
| BUMETANIDE                          | 28395-03-1                      | C17H20N2O5S           | 364.42        | USP, INN, BAN, JAN           |
| BUPIVACAINE HYDROCHLORIDE           | 14252-80-3, 2180-92-9           | C18H29CIN2O           | 324.90        | USP, INN, BAN, JAN           |
| BUPROPION                           | 31677-93-7, 34911-55-2          | C13H19Cl2NO           | 276.21        | USP, INN, BAN                |
| BUSULFAN                            | 55-98-1                         | C6H14O6S2             | 246.30        | USP, INN, BAN, JAN           |
| BUTACAINE                           | 149-15-5, 149-16-6 [butacaine]  | C18H30N2O2            | 306.45        | USP-XX, INN, BAN             |
| BUTAMBEN                            | 94-25-7                         | C11H15NO2             | 193.25        | USP                          |
| CACODYLIC ACID                      | 75-60-5                         | C2H7AsO2              | 138.00        | experimental                 |
| <b>CAFFEINE</b>                     | <b>58-08-2, 5743-12-4</b>       | <b>C8H10N4O2</b>      | <b>194.19</b> | <b>USP, INN, BAN, JAN</b>    |
| CALCEIN                             | 1461-15-0                       | C30H26N2O13           | 622.55        | experimental                 |
| CAMPTOTHECIN                        | 7689-03-4                       | C20H16N2O4            | 348.36        | experimental                 |
| CANDESARTAN CILEXTIL                | 139481-59-7                     | C33H34N6O6            | 610.68        | USAN, INN                    |
| CANRENOIC ACID, POTASSIUM SALT      | 2181-04-6, 4138-96-9            | C22H29KO4             | 396.58        | USAN, INN, BAN, JAN          |
| CANRENONE                           | 976-71-6                        | C22H28O3              | 340.47        | USAN, INN                    |
| CAPREOMYCIN SULFATE                 | 1405-37-4, 11003-38-6           | C25H46N14O12S         | 766.80        | USP, INN, BAN, JAN           |
| CAPSANTHIN                          | 465-42-9                        | C40H56O3              | 584.89        | experimental                 |
| CAPTOPRIL                           | 62571-86-2                      | C9H15NO3S             | 217.29        | USP, INN, BAN, JAN           |
| CARBACHOL                           | 51-83-2                         | C6H15CIN2O2           | 182.65        | USP, INN, BAN, JAN           |
| CARBADOX                            | 6804-07-5                       | C11H10N4O4            | 262.23        | USAN, INN, BAN               |
| CARBAMAZEPINE                       | 298-46-4                        | C15H12N2O             | 236.28        | USP, INN, BAN, JAN           |
| CARBENICILLIN DISODIUM              | 4800-94-6, 4697-36-3            | C17H16N2Na2O6S        | 422.37        | USP, INN, BAN, JAN           |



Source:  
MicroSource Discovery Systems, Inc.

Kraft et al., TableS1  
NINDS Custom Collection II  
Compound Library

Yellow: Fascin-pathway enhancer  
Blue: Fascin-pathway blocker  
Green: Both

|                               |                                 |                 |        |                     |
|-------------------------------|---------------------------------|-----------------|--------|---------------------|
| CARBENOXOLONE SODIUM          | 7421-40-1, 5697-56-3            | C34H48Na2O7     | 614.74 | USAN, INN, BAN, JAN |
| CARBETAPENTANE CITRATE        | 23142-01-0, 77-23-6             | C26H39NO10      | 525.60 | NF-XIII, INN, BAN   |
| CARBIMAZOLE                   | 22232-54-8                      | C7H10N2O2S      | 186.23 | INN, BAN            |
| CARBINOXAMINE MALEATE         | 3505-38-2, 486-16-8             | C20H23CIN2O5    | 406.87 | USP, INN, BAN, JAN  |
| CARBOPLATIN                   | 41575-94-4                      | C6H12N2O4Pt     | 371.26 | USP, INN, BAN, JAN  |
| CARISOPRODOL                  | 78-44-4                         | C12H24N2O4      | 260.34 | USP, INN, BAN       |
| CARMOFUR                      | 61422-45-5                      | C11H16FN3O3     | 257.27 | INN, JAN            |
| CARMUSTINE                    | 154-93-8                        | C5H9Cl2N3O2     | 214.05 | USAN, INN, BAN      |
| CARNITINE HYDROCHLORIDE       | 461-06-3                        | C7H16CINO3      | 197.66 | INN, JAN            |
| CARPROFEN                     | 53716-49-7                      | C15H12CINO2     | 273.72 | USAN, INN, BAN      |
| CARVEDILOL TARTRATE           | 72956-09-3 (carvedilol)         | C28H32N2O10     | 556.57 | USAN, INN, BAN, JAN |
| CEFACTOR                      | 70356-03-5, 53994-73-3          | C15H14CIN3O4S   | 367.81 | USP, INN, BAN, JAN  |
| CEFADROXIL                    | 66592-87-8, 50370-12-2          | C16H17N3O5S     | 363.39 | USP, INN, BAN, JAN  |
| CEFAMANDOLE NAFATE            | 42540-40-9, 34444-01-4          | C19H17N6NaO6S2  | 512.50 | USP, BAN            |
| CEFAZOLIN SODIUM              | 27164-46-1, 25953-19-9          | C14H13N8NaO4S3  | 476.49 | USP, INN, BAN       |
| CEFDINIR                      | 91832-40-5                      | C14H13N5O5S2    | 395.42 | USAN, INN, BAN      |
| CEFDITORIN PIVOXIL            | 117467-28-4                     | C25H28N6O7S3    | 620.73 | INN, JAN            |
| CEFMETAZOLE SODIUM            | 56796-39-5                      | C15H16N7NaO5S3  | 493.52 | USP, INN            |
| CEFOPERAZONE SODIUM           | 62893-20-3, 62893-19-0          | C25H26N9NaO8S2  | 667.66 | USP, INN, BAN, JAN  |
| CEFOTAXIME SODIUM             | 64485-93-4, 63527-52-6          | C16H16N5NaO7S2  | 477.45 | USP, INN, BAN, JAN  |
| CEFOXITIN SODIUM              | 66309-69-1, 61622-34-2          | C16H16N3NaO7S2  | 449.44 | USP, INN, BAN, JAN  |
| CEFTIBUTEN                    | 97519-39-6                      | C15H14N4O6S2    | 410.43 | USAN, INN, BAN      |
| CEFTRIAZONE SODIUM            | 73384-59-5 [ceftriaxone]        | C18H16N8Na2O7S3 | 598.55 | USP, INN, BAN, JAN  |
| CEFUROXIME SODIUM             | 56238-63-2                      | C16H15N4NaO8S   | 446.37 | USAN, INN, BAN      |
| CELASTROL                     | 34157-83-0                      | C29H38O4        | 450.62 | experimental        |
| CELECOXIB                     | 169590-42-5                     | C17H14F3N3O2S   | 381.38 | USAN, INN, BAN      |
| CEPHALEXIN                    | 23325-78-2, 15686-71-2          | C16H17N3O4S     | 347.40 | USP, INN, BAN, JAN  |
| CEPHALORIDINE                 | 50-59-9                         | C19H17N3O4S2    | 415.49 | USAN, INN, BAN, JAN |
| CEPHALOTHIN SODIUM            | 58-71-9, 153-61-7 [cephalothin] | C16H15N2NaO6S2  | 418.43 | USP, INN, BAN, JAN  |
| CEPHAPIRIN SODIUM             | 24356-60-3, 21593-23-7          | C17H16N3NaO6S2  | 445.45 | USP, INN, BAN, JAN  |
| CEPHARANTHINE                 | 481-49-2                        | C37H38N2O6      | 606.73 | JAN                 |
| CEPHRADINE                    | 38821-53-3 [anhydrous], 58456   | C16H19N3O4S     | 349.41 | USP, INN, BAN, JAN  |
| CETRIMONIUM BROMIDE           | 57-09-0, 6899-10-1              | C19H42BrN       | 364.46 | INN, BAN            |
| CETYLPYRIDINIUM CHLORIDE      | 6004-24-6, 123-03-5             | C21H38CIN       | 340.00 | USP, INN, BAN, JAN  |
| CEVADINE                      | 62-59-9                         | C32H49NO9       | 591.75 | experimental        |
| CHAULMOSULFONE                | 473-32-5                        | C48H76N2O4S     | 777.22 | INN                 |
| CHLORAMPHENICOL               | 56-75-7                         | C11H12Cl2N2O5   | 323.13 | USP, INN, BAN, JAN  |
| CHLORAMPHENICOL HEMISUCCINATE | 982-57-0, 56-75-7               | C15H16Cl2N2O8   | 423.21 | USP, BAN, JAN       |
| CHLORANIL                     | 118-75-2                        | C6Cl4O2         | 245.88 | experimental        |
| CHLORMADINONE ACETATE         | 302-22-7                        | C23H29ClO4      | 404.94 | USAN, INN, BAN, JAN |
| CHLORMEZANONE                 | 80-77-3                         | C11H12CINO3S    | 273.74 | INN, BAN, JAN       |

Source:  
MicroSource Discovery Systems, Inc.

Kraft et al., TableS1  
NINDS Custom Collection II  
Compound Library

Yellow: Fascin-pathway enhancer  
Blue: Fascin-pathway blocker  
Green: Both

|                                   |                                |                |        |                     |
|-----------------------------------|--------------------------------|----------------|--------|---------------------|
| CHLOROACETOXYQUINOLINE            |                                | C11H8ClNO2     | 221.64 | experimental        |
| CHLOROCRESOL                      | 59-50-7                        | C7H7ClO        | 142.59 | NF, INN             |
| CHLOROGUANIDE HYDROCHLORIDE       | 637-32-1                       | C11H17Cl2N5    | 290.20 | USP-XIV, INN, BAN   |
| CHLOROPHYLLIDE Cu COMPLEX Na SALT | 15611-43-5                     | C34H28Cu4Na2O5 | 682.15 | USP, JAN            |
| CHLOROQUINE DIPHOSPHATE           | 54-05-7                        | C18H32ClN3O8P2 | 515.87 | USP, BAN            |
| CHLOROTHIAZIDE                    | 58-94-6                        | C7H6ClN3O4S2   | 295.72 | USP, INN, BAN       |
| CHLOROTRIANISENE                  | 569-57-3                       | C23H21ClO3     | 380.88 | USP-XIII, INN, BAN  |
| CHLOROXINE                        | 773-76-2                       | C9H5Cl2NO      | 214.05 | USAN                |
| CHLOROXYLENOL                     | 88-04-0                        | C8H9ClO        | 156.61 | USP, INN, BAN       |
| CHLORPHENIRAMINE (S) MALEATE      | 113-92-8, 132-22-9             | C20H23ClN2O4   | 390.87 | USP, INN, BAN       |
| CHLORPROMAZINE                    | 50-53-3                        | C17H19ClN2S    | 318.87 | USP, INN, BAN, JAN  |
| CHLORPROPAMIDE                    | 94-20-2                        | C10H13ClN2O3S  | 276.74 | USP, INN, BAN, JAN  |
| CHLORTETRACYCLINE HYDROCHLORIDE   | 64-72-2                        | C22H24Cl2N2O8  | 515.35 | USP, BAN            |
| CHLORTHALIDONE                    | 77-36-1                        | C14H11ClN2O4S  | 338.77 | USP, INN, BAN, JAN  |
| CHLORZOAZONE                      | 95-25-0                        | C7H4ClNO2      | 169.57 | USP, INN, BAN, JAN  |
| CHRYSANTHEMIC ACID                | 10453-89-1                     | C10H16O2       | 168.24 | experimental        |
| CHRYSIN                           | 480-40-0                       | C15H10O4       | 254.24 | experimental        |
| CICLOPIROX OLAMINE                | 41621-49-2                     | C14H24N2O3     | 268.36 | USP, INN, BAN       |
| CILOSTAZOL                        | 73963-72-1                     | C20H27N5O2     | 369.47 | USAN, INN, BAN, JAN |
| CIMETIDINE                        | 51481-61-9                     | C10H16N6S      | 252.34 | USP, INN, BAN, JAN  |
| CINEOLE                           | 470-82-6                       | C10H18O        | 154.25 | experimental        |
| CINNARAZINE                       | 298-57-7                       | C26H28N2       | 368.53 | USAN, INN, BAN, JAN |
| CINOXACIN                         | 28657-80-9                     | C12H10N2O5     | 262.22 | USP, INN, BAN, JAN  |
| CIPROFLOXACIN                     | 85721-33-1                     | C17H18FN3O3    | 331.35 | USP, INN, BAN       |
| CISPLATIN                         | 15663-27-1                     | H6Cl2N2Pt      | 300.06 | USP, INN, BAN, JAN  |
| CITICOLINE                        | 987-78-0                       | C14H26N4O11P2  | 488.33 | USAN, INN, JAN      |
| CITIOLONE                         | 1195-16-0                      | C6H9NO2S       | 159.21 | INN                 |
| CITRININ                          | 518-75-2                       | C13H14O5       | 250.25 | experimental        |
| CITROPTEN                         | 487-06-9                       | C11H10O4       | 206.20 | experimental        |
| CLARITHROMYCIN                    | 81103-11-9                     | C38H69NO13     | 747.97 | USP, INN, BAN, JAN  |
| CLEBOPRIDE MALEATE                | 55905-53-8                     | C24H28ClN3O6   | 489.96 | USAN, INN, BAN, JAN |
| CLEMASTINE                        | 15686-51-8                     | C25H30ClNO5    | 459.97 | USAN, BAN           |
| CLIDINIUM BROMIDE                 | 3485-62-9                      | C22H26BrNO3    | 432.36 | USP, INN, BAN       |
| CLINDAMYCIN HYDROCHLORIDE         | 21462-39-5, 58207-19-5         | C18H34Cl2N2O5S | 461.45 | USAN, INN, BAN      |
| CLOBETASOL PROPIONATE             | 25122-46-7, 25122-41-2         | C25H32ClFO5    | 466.98 | USP, INN, BAN, JAN  |
| CLOFIBRIC ACID                    | 882-09-7                       | C10H11ClO3     | 214.65 | INN                 |
| CLOFOCTOL                         | 37693-01-9                     | C21H26Cl2O     | 365.35 | INN                 |
| CLOMIPHENE CITRATE                | 50-41-9, 911-45-5 [clomiphene] | C32H36ClNO8    | 598.10 | USP, INN, BAN       |
| CLOMIPRAMINE HYDROCHLORIDE        | 17321-77-6, 303-49-1           | C19H24Cl2N2    | 351.32 | USP, INN, BAN, JAN  |
| CLONIDINE HYDROCHLORIDE           | 4205-91-8, 4205-90-7           | C9H10Cl3N3     | 266.56 | USP, INN, BAN       |
| CLOPERASTINE HYDROCHLORIDE        | 3703-76-2                      | C20H25Cl2NO    | 366.33 | INN, JAN            |

Source:  
MicroSource Discovery Systems, Inc.

Kraft et al., TableS1  
NINDS Custom Collection II  
Compound Library

Yellow: Fascin-pathway enhancer  
Blue: Fascin-pathway blocker  
Green: Both

|                               |                                |                   |         |                       |
|-------------------------------|--------------------------------|-------------------|---------|-----------------------|
| CLOPIDOGREL SULFATE           | 113665-84-2                    | C16H18CINO6S2     | 419.91  | USP, INN, BAN         |
| CLOPIDOL                      | 2971-90-6                      | C7H7Cl2NO         | 192.05  | USAN, INN, BAN        |
| CLOTRIMAZOLE                  | 23593-75-1                     | C22H17CIN2        | 344.85  | USP, INN, BAN, JAN    |
| CLOXACILLIN SODIUM            | 7081-44-9, 642-78-4            | C19H17CIN3NaO5S   | 457.87  | USP, INN, BAN, JAN    |
| CLOXYQUIN                     | 130-16-5                       | C9H6CINO          | 179.61  | USAN, INN             |
| CLOZAPINE                     | 5786-21-0                      | C18H19CIN4        | 326.83  | USP, INN, BAN         |
| COLCHICEINE                   | 477-27-0                       | C21H23NO6         | 385.42  | experimental          |
| COLCHICINE                    | 64-86-8                        | C22H25NO6         | 399.45  | USP, JAN              |
| COLFORSIN                     | 66575-29-9                     | C22H34O7          | 410.51  | USAN, INN             |
| COLISTIMETHATE SODIUM         | 8068-28-8, 21362-08-3          | C57H103N16Na5O28S | 1735.82 | USP, INN, BAN, JAN    |
| CONVALLATOXIN                 | 508-75-8                       | C29H42O10         | 550.65  | experimental          |
| CORALYNE CHLORIDE             | 38989-38-7                     | C22H22CINO4       | 399.88  | experimental          |
| CORTISONE ACETATE             | 50-04-4, 53-06-5 [cortisone]   | C23H30O6          | 402.49  | USP, INN, BAN, JAN    |
| COTININE                      | 5695-98-7, 486-56-6 [cotinine] | C10H12N2O         | 176.22  | experimental          |
| CREATININE                    | 60-27-5                        | C4H7N3O           | 113.12  | undetermined activity |
| CRESOL                        | 1319-77-3                      | C7H8O             | 108.14  | NF, JAN               |
| CROMOLYN SODIUM               | 15826-37-6, 16110-51-3         | C23H14Na2O11      | 512.34  | USP, INN, BAN, JAN    |
| CROTAMITON                    | 483-63-6                       | C13H17NO          | 203.29  | USP, INN, BAN, JAN    |
| CRUSTECDYSONE                 | 5289-74-7                      | C27H44O7          | 480.65  | experimental          |
| CURCUMIN                      | 458-37-7                       | C21H20O6          | 368.39  | experimental          |
| CYCLIZINE                     | 82-92-8                        | C18H22N2          | 266.39  | USP, BAN              |
| CYCLOBENZAPRINE HYDROCHLORIDE | 6202-23-9, 303-53-7            | C20H22CIN         | 311.86  | USP, INN              |
| CYCLOCREATINE                 | 35404-50-3                     | C5H9N3O2          | 143.15  | experimental          |
| CYCLOHEXIMIDE                 | 66-81-9                        | C15H23NO4         | 281.35  | USAN, INN             |
| CYCLOLEUCINE                  | 52-52-8                        | C6H11NO2          | 129.16  | experimental          |
| CYCLOPENTOLATE HYDROCHLORIDE  | 5870-29-1, 512-15-2            | C17H26CINO3       | 327.85  | USP, INN, BAN, JAN    |
| CYCLOPHOSPHAMIDE HYDRATE      | 6055-19-2, 50-18-0 [anhydrous] | C7H17Cl2N2O3P     | 279.10  | USP, INN, BAN, JAN    |
| CYCLOSERINE                   | 68-41-7                        | C3H6N2O2          | 102.09  | USP, INN, BAN, JAN    |
| CYCLOSPORINE                  | 59865-13-3                     | C62H111N11O12     | 1202.64 | USP, INN, BAN, JAN    |
| CYPROTERONE                   | 2098-66-0                      | C22H27ClO3        | 374.91  | INN, BAN, JAN         |
| CYSTAMINE DIHYDROCHLORIDE     | 56-17-7                        | C4H14Cl2N2S2      | 225.20  | experimental          |
| CYTARABINE                    | 147-94-4                       | C9H13N3O5         | 243.22  | USP, INN, BAN, JAN    |
| CYTISINE                      | 485-35-8                       | C11H14N2O         | 190.25  | INN                   |
| d[-Arg-2]KYOTORPHAN ACETATE   |                                | C17H27N5O6        | 397.43  | experimental          |
| DANAZOL                       | 17230-88-5                     | C22H27NO2         | 337.47  | USP, INN, BAN, JAN    |
| DAPSONE                       | 80-08-0                        | C12H12N2O2S       | 248.31  | USP, INN, BAN         |
| DEFEROXAMINE MESYLATE         | 138-14-7, 70-51-9              | C26H52N6O11S      | 656.80  | USAN, INN, BAN        |
| DEGUELIN(-)                   | 522-17-8                       | C23H22O6          | 394.43  | experimental          |
| DELTALINE                     | 6836-11-9                      | C24H37NO7         | 451.56  | experimental          |
| DEMECLOCYCLINE HYDROCHLORIDE  | 127-33-3                       | C21H22Cl2N2O8     | 501.32  | USP, BAN, JAN         |
| DEQUALINIUM CHLORIDE          | 522-51-0, 6707-58-0            | C30H40Cl2N4       | 527.59  | INN, BAN, JAN         |

Source:  
MicroSource Discovery Systems, Inc.

Kraft et al., TableS1  
NINDS Custom Collection II  
Compound Library

Yellow: Fascin-pathway enhancer  
Blue: Fascin-pathway blocker  
Green: Both

|                                    |                                |                  |        |                     |
|------------------------------------|--------------------------------|------------------|--------|---------------------|
| DERACOXIB                          | 169590-41-4                    | C17H14F3N3O3S    | 397.38 | USAN, INN           |
| DESIPRAMINE HYDROCHLORIDE          | 58-28-6, 50-47-5 [desipramine] | C18H23ClN2       | 302.85 | USP, INN, BAN, JAN  |
| DESMETHYLDIHYDROCAPSAICIN          |                                | C17H27NO3        | 293.41 | experimental        |
| DESOXYCORTICOSTERONE ACETATE       | 56-47-3                        | C23H32O4         | 372.51 | USP, INN, BAN       |
| DEXAMETHASONE                      | 50-02-2                        | C22H29FO5        | 392.47 | USP, INN, BAN, JAN  |
| DEXAMETHASONE ACETATE              | 55812-90-3, 1177-87-3          | C24H31FO6        | 434.51 | USP, INN, BAN, JAN  |
| DEXAMETHASONE SODIUM PHOSPHATE     | 2392-39-4, 312-93-6            | C22H28FNa2O8P    | 516.42 | USP, BAN, JAN       |
| DEXPROPRANOLOL HYDROCHLORIDE       | 13071-11-9                     | C16H22ClNO2      | 295.81 | USAN, INN, BAN      |
| DEXTROMETHORPHAN HYDROBROMIDE      | 6700-34-1, 125-69-9            | C18H26BrNO       | 352.32 | USP, INN, BAN       |
| DIALLYL SULFIDE                    | 592-88-1                       | C6H10S           | 114.21 | experimental        |
| DIAZOXIDE                          | 364-98-7                       | C8H7ClN2O2S      | 230.67 | USP, INN, BAN       |
| DIBENZOTHIOPHENE                   | 132-65-0                       | C12H8S           | 184.26 | USAN                |
| DIBENZOYLMETHANE                   | 120-46-7                       | C15H12O2         | 224.26 | experimental        |
| DIBUCAINE HYDROCHLORIDE            | 61-12-1, 85-79-0 [dibucaine]   | C20H30ClN3O2     | 379.93 | USP, INN, BAN       |
| DICLOFENAC SODIUM                  | 15307-79-6                     | C14H10Cl2NNaO2   | 318.14 | USP, JAN            |
| DICLOXACILLIN SODIUM               | 13412-64-1, 343-55-5           | C19H16Cl2N3NaO5S | 492.32 | USAN, INN, BAN      |
| DICUMAROL                          | 66-76-2                        | C19H12O6         | 336.30 | USAN, INN           |
| DIENESTROL                         | 84-17-3, 13029-44-2 [//E,E//]  | C18H18O2         | 266.34 | USP, INN, BAN       |
| DIETHYLCARBAMAZINE CITRATE         | 1642-54-2, 90-89-1             | C16H29N3O8       | 391.42 | USP, INN, BAN, JAN  |
| DIETHYLSTILBESTROL                 | 56-53-1                        | C18H20O2         | 268.36 | USP, INN, BAN       |
| DIETHYLTOLUAMIDE                   | 134-62-3                       | C12H17NO         | 191.28 | USP, INN, BAN       |
| DIFLUNISAL                         | 22494-42-4                     | C13H8F2O3        | 250.20 | USP, INN, BAN, JAN  |
| DIGITOXIN                          | 71-63-6                        | C41H64O13        | 764.96 | USP, INN, BAN, JAN  |
| DIGOXIN                            | 20830-75-5                     | C41H64O14        | 780.96 | USP, INN, BAN, JAN  |
| DIHYDROJASMONIC ACID               | 98674-52-3                     | C12H20O3         | 212.29 | experimental        |
| DIHYDROJASMONIC ACID, METHYL ESTER | 24851-98-7                     | C13H22O3         | 226.32 | experimental        |
| DIHYDROSTREPTOMYCIN SULFATE        | 5490-27-7, 128-46-1            | C21H43N7O16S     | 681.68 | USP, INN, BAN, JAN  |
| DILTIAZEM HYDROCHLORIDE            | 33286-22-5, 42399-41-7         | C22H27ClN2O4S    | 450.99 | USP, INN, BAN, JAN  |
| DIMENHYDRINATE                     | 523-87-5                       | C24H28ClN5O3     | 469.98 | USP, INN, BAN, JAN  |
| DIMETHADIONE                       | 695-53-4                       | C5H7NO3          | 129.12 | USAN, INN           |
| DINITOLMIDE                        | 148-01-6                       | C8H7N3O5         | 225.16 | INN, BAN            |
| DIOXYBENZONE                       | 131-53-3                       | C14H12O4         | 244.25 | USP, INN            |
| DIPHENHYDRAMINE HYDROCHLORIDE      | 147-24-0                       | C17H22ClNO       | 291.82 | USP, INN, BAN, JAN  |
| DIPHENYLPYRALINE HYDROCHLORIDE     | 132-18-3 147-20-6              | C19H24ClNO       | 317.86 | USP-XXI, INN, BAN,  |
| DIPLOSALSALATE                     | 530-75-6                       | C16H12O6         | 300.27 | experimental        |
| DIPYRIDAMOLE                       | 58-32-2                        | C24H40N8O4       | 504.64 | USP, INN, BAN, JAN  |
| DIPYRONE                           | 5907-38-0, 68-89-3 [anhydrous] | C13H16N3NaO4S    | 333.34 | USAN, INN, BAN, JAN |
| DIRITHROMYCIN                      | 62013-04-1                     | C42H78N2O14      | 835.09 | USP, INN, BAN       |
| DISOPYRAMIDE PHOSPHATE             | 3737-09-5                      | C21H32N3O5P      | 437.48 | USP, INN, BAN, JAN  |
| DISULFIRAM                         | 97-77-8                        | C10H20N2S4       | 296.54 | USP, INN, BAN, JAN  |
| DOPAMINE HYDROCHLORIDE             | 62-31-7, 51-61-6 [dopamine]    | C8H12ClNO2       | 189.64 | USP, INN, BAN, JAN  |

Source:  
MicroSource Discovery Systems, Inc.

Kraft et al., TableS1  
NINDS Custom Collection II  
Compound Library

Yellow: Fascin-pathway enhancer  
Blue: Fascin-pathway blocker  
Green: Both

|                                  |                                 |               |         |                     |
|----------------------------------|---------------------------------|---------------|---------|---------------------|
| DOXEPIN HYDROCHLORIDE            | 1229-29-4, 1668-19-5            | C19H22ClNO    | 315.85  | USP, INN, BAN       |
| DOXYCYCLINE HYDROCHLORIDE        | 17086-28-1, 564-25-0            | C22H25ClN2O8  | 480.91  | USP, INN, BAN       |
| DOXYLAMINE SUCCINATE             | 562-10-7, 469-21-6              | C21H28N2O5    | 388.47  | USP, INN, BAN       |
| D-PHENYLALANINE                  | 673-06-3                        | C9H11NO2      | 165.19  | INN                 |
| DROPERIDOL                       | 548-73-2                        | C22H22FN3O2   | 379.44  | USP, INN, BAN, JAN  |
| DROPROPIZINE                     | 17692-31-8                      | C13H20N2O2    | 236.32  | INN, BAN            |
| DYCLONINE HYDROCHLORIDE          | 536-43-6, 586-60-7 [dyclonine]  | C18H28ClNO2   | 325.88  | USP, INN, BAN       |
| DYPHYLLINE                       | 479-18-5                        | C10H14N4O4    | 254.25  | USP, INN, BAN, JAN  |
| EBSELEN                          | 60940-34-3                      | C13H9NOSe     | 274.18  | INN                 |
| ECONAZOLE NITRATE                | 68797-31-9, 27220-47-9          | C18H16Cl3N3O4 | 444.70  | USP, INN, BAN, JAN  |
| EDROPHONIUM CHLORIDE             | 116-38-1, 312-48-1              | C10H16ClNO    | 201.70  | USP, INN, BAN, JAN  |
| ELAIDYLPHOSPHOCHOLINE            |                                 | C23H48NO4P    | 433.62  | experimental        |
| ELLAGIC ACID                     | 476-66-4                        | C14H6O8       | 302.20  | INN                 |
| EMETINE                          | 316-42-7, 483-18-1 [emetine]    | C29H42Cl2N2O4 | 553.58  | USP, BAN            |
| EMODIC ACID                      | 578-45-5                        | C15H8O7       | 300.23  | experimental        |
| ENALAPRIL MALEATE                | 76095-16-4, 75847-73-3          | C24H32N2O9    | 492.53  | USP, INN, BAN, JAN  |
| ENOXACIN                         | 74011-58-8                      | C15H17FN4O3   | 320.33  | USAN, INN, BAN, JAN |
| EPHEDRINE (1R,2S) HYDROCHLORIDE  | 50-98-6 [(R)-]ephedrine,        | C10H16ClNO    | 201.70  | USAN, INN, BAN, JAN |
| ERGOCALCIFEROL                   | 50-14-6                         | C28H44O       | 396.66  | USP, INN, BAN, JAN  |
| ERGONOVINE MALEATE               | 129-51-1, 60-79-7 [ergonovine]  | C23H27N3O6    | 441.49  | USP, INN, BAN, JAN  |
| ERYTHROMYCIN ESTOLATE            | 134-36-1, 114-07-8              | C52H97NO18S   | 1056.41 | USP, INN, BAN, JAN  |
| ESERINE                          | 57-47-6                         | C15H21N3O2    | 275.35  | USP, BAN            |
| ESTRADIOL                        | 50-28-2                         | C18H24O2      | 272.39  | USP, INN, BAN       |
| ESTRADIOL ACETATE                | 4245-41-4                       | C20H26O3      | 314.43  | USAN                |
| ESTRADIOL CYPIONATE              | 313-06-4                        | C26H36O3      | 396.58  | USP                 |
| ESTRADIOL DIACETATE              | 34334-88-6                      | C22H28O4      | 356.47  | experimental        |
| ESTRADIOL METHYL ETHER           | 1035-77-4                       | C19H26O2      | 286.42  | experimental        |
| ESTRADIOL PROPIONATE             | 113-38-2                        | C21H28O3      | 328.46  | NF-XIV, JAN         |
| ESTRADIOL VALERATE               | 979-32-8                        | C23H32O3      | 356.51  | USP                 |
| ESTRADIOL-3-SULFATE, SODIUM SALT |                                 | C18H23NaO5S   | 374.43  | experimental        |
| ESTRIOL                          | 50-27-1, 514-68-1 [as,          | C18H24O3      | 288.39  | USP, INN, BAN, JAN  |
| ESTRIOL BENZYL ETHER             |                                 | C25H30O3      | 378.52  | experimental        |
| ESTRIOL METHYL ETHER             | 1474-53-9                       | C19H26O3      | 302.42  | experimental        |
| ESTRONE                          | 53-16-7                         | C18H22O2      | 270.37  | USP, INN, BAN       |
| ESTRONE ACETATE                  |                                 | C20H24O3      | 312.41  | experimental        |
| ESTRONE HEMISUCCINATE            |                                 | C22H26O5      | 370.45  | experimental        |
| ETANIDAZOLE                      | 22668-01-5                      | C7H10N4O4     | 214.18  | USAN, INN           |
| ETHAMBUTOL HYDROCHLORIDE         | 1070-11-7, 74-55-5              | C10H26Cl2N2O2 | 277.24  | USP, INN, BAN, JAN  |
| ETHAVERINE HYDROCHLORIDE         | 985-13-7, 486-47-5 [ethaverine] | C24H30ClNO4   | 431.96  | INN                 |
| ETHINYL ESTRADIOL                | 57-63-6                         | C20H24O2      | 296.41  | USP, INN, BAN, JAN  |
| ETHIONAMIDE                      | 536-33-4                        | C8H10N2S      | 166.25  | USP, INN, BAN, JAN  |

Source:  
MicroSource Discovery Systems, Inc.

Kraft et al., TableS1  
NINDS Custom Collection II  
Compound Library

Yellow: Fascin-pathway enhancer  
Blue: Fascin-pathway blocker  
Green: Both

|                                                          |                              |                 |        |                     |
|----------------------------------------------------------|------------------------------|-----------------|--------|---------------------|
| ETHISTERONE                                              | 434-03-7                     | C21H28O2        | 312.46 | NF-XIII, INN, BAN   |
| ETHOPROPAZINE HYDROCHLORIDE                              | 1094-08-2, 522-00-9          | C19H25CIN2S     | 348.94 | USP-XXIII, INN, BAN |
| ETHOSUXIMIDE                                             | 77-67-8                      | C7H11NO2        | 141.17 | USP, INN, BAN, JAN  |
| ETHYL 1-BENZYL-3-HYDROXY- 2-OXO[5H]PYRROLE-4-CARBOXYLATE |                              | C14H15NO4       | 261.28 | experimental        |
| ETHYLNOREPINEPHRINE HYDROCHLORIDE                        | 3198-07-0, 536-24-3          | C10H16CINO3     | 233.70 | INN                 |
| ETODOLAC                                                 | 41340-25-4                   | C17H21NO3       | 287.36 | USP, INN, BAN       |
| EUCATROPINE HYDROCHLORIDE                                | 536-93-6, 100-91-4           | C17H26CINO3     | 327.85 | USP, INN, BAN       |
| EUGENOL                                                  | 97-53-0                      | C10H12O2        | 164.21 | USP                 |
| EXALAMIDE                                                | 53370-90-4                   | C13H19NO2       | 221.30 | INN, JAN            |
| EZETIMIBE                                                | 163222-33-1                  | C24H21F2NO3     | 409.44 | USAN, INN, BAN      |
| FAMCICLOVIR                                              | 104227-87-4                  | C14H19N5O4      | 321.34 | USAN, INN, BAN      |
| FAMOTIDINE                                               | 76824-35-6                   | C8H15N7O2S3     | 337.45 | USP, INN, BAN, JAN  |
| FENBENDAZOLE                                             | 43210-67-9                   | C15H13N3O2S     | 299.35 | USAN, INN, BAN      |
| FENBUFEN                                                 | 36330-85-5                   | C16H14O3        | 254.29 | USAN, INN, BAN, JAN |
| FENBUTYRAMIDE                                            | 90-26-6                      | C10H13NO        | 163.22 | experimental        |
| FENDILINE HYDROCHLORIDE                                  | 113042-18-7                  | C23H26CIN       | 351.92 | INN                 |
| FENOFIBRATE                                              | 49562-28-9                   | C20H21ClO4      | 360.84 | INN, BAN            |
| FENOPROFEN                                               | 31879-05-7                   | C15H14O3        | 242.28 | USAN, INN, BAN      |
| FENOTEROL HYDROBROMIDE                                   | 13392-18-2                   | C17H22BrNO4     | 384.27 | USAN, INN, BAN, JAN |
| FENSPIRIDE HYDROCHLORIDE                                 | 5053-08-7, 5053-06-5         | C15H21CIN2O2    | 296.80 | USAN, INN           |
| FIPEXIDE HYDROCHLORIDE                                   | 34161-24-5                   | C20H22Cl2N2O4   | 425.32 | INN                 |
| FLOXURIDINE                                              | 50-91-9                      | C9H11FN2O5      | 246.20 | USP                 |
| FLUDROCORTISONE ACETATE                                  | 514-36-3, 127-31-1           | C23H31FO6       | 422.50 | USP, INN, BAN, JAN  |
| FLUFENAMIC ACID                                          | 530-78-9                     | C14H10F3NO2     | 281.24 | USAN, INN, BAN, JAN |
| FLUMEQUINE                                               | 42835-25-6                   | C14H12FNO3      | 261.26 | USAN, INN, BAN      |
| FLUMETHAZONE PIVALATE                                    | 2002-29-1, 2135-17-3         | C27H36F2O6      | 494.58 | USP, INN, BAN, JAN  |
| FLUNARIZINE HYDROCHLORIDE                                | 30484-77-6, 52468-60-7       | C26H28Cl2F2N2   | 477.43 | USAN, INN, BAN, JAN |
| FLUNISOLIDE                                              | 77326-96-6, 3385-03-3        | C24H31FO6       | 434.51 | USP, INN, BAN, JAN  |
| FLUOCINONIDE                                             | 356-12-7                     | C26H32F2O7      | 494.54 | USP, INN, BAN, JAN  |
| FLUOROMETHOLONE                                          | 426-13-1                     | C22H29FO4       | 376.47 | USP, INN, BAN, JAN  |
| FLUOROURACIL                                             | 51-21-8                      | C4H3FN2O2       | 130.08 | USP, INN, BAN, JAN  |
| FLUOXETINE                                               | 54910-89-3                   | C17H19ClF3NO    | 345.80 | USAN, INN, BAN      |
| FLUPHENAZINE HYDROCHLORIDE                               | 146-56-5                     | C22H28Cl2F3N3OS | 510.45 | USP, BAN, JAN       |
| FLURANDRENOLIDE                                          | 1524-88-5                    | C24H33FO6       | 436.53 | USP, INN, BAN, JAN  |
| FLURBIPROFEN                                             | 5104-49-4                    | C15H13FO2       | 244.27 | USP, INN, BAN, JAN  |
| FLUTAMIDE                                                | 13311-84-7                   | C11H11F3N2O3    | 276.22 | USP, INN, BAN       |
| FOLIC ACID                                               | 59-30-3                      | C19H19N7O6      | 441.41 | USP, INN, BAN, JAN  |
| FORMESTANE                                               | 566-48-3                     | C20H28O2        | 300.44 | INN, BAN            |
| FOSCARNET SODIUM                                         | 63585-09-1                   | CNa3O5P         | 191.95 | USAN, INN, BAN      |
| FOSFOMYCIN                                               | 26472-47-9, 23112-90-5(acid) | C3H5CaO4P       | 176.12 | USAN, INN, BAN      |
| FOSFOSAL                                                 | 6064-83-1                    | C7H7O6P         | 218.10 | INN                 |

Source:  
MicroSource Discovery Systems, Inc.

Kraft et al., TableS1  
NINDS Custom Collection II  
Compound Library

Yellow: Fascin-pathway enhancer  
Blue: Fascin-pathway blocker  
Green: Both

|                           |                                 |               |        |                    |
|---------------------------|---------------------------------|---------------|--------|--------------------|
| FURAZOLIDONE              | 67-45-8                         | C8H7N3O5      | 225.16 | USP, INN, BAN      |
| FUREGRELATE SODIUM        | 87463-91-0, 85666-24-6          | C15H10NNaO3   | 275.24 | USAN, INN          |
| FUROSEMIDE                | 54-31-9                         | C12H11ClN2O5S | 330.75 | USP, INN, BAN, JAN |
| FUSIDIC ACID              | 6990-06-3                       | C31H48O6      | 516.72 | USAN, INN, BAN     |
| GABOXADOL HYDROCHLORIDE   | 64603-91-4                      | C6H9ClN2O2    | 176.60 | INN                |
| GALANTHAMINE HYDROBROMIDE | 357-70-0, 1953-04-4             | C17H22BrNO3   | 368.27 | USAN               |
| GALLAMINE TRIETHIODIDE    | 65-29-2, 153-76-4 [gallamine]   | C30H60I3N3O3  | 891.54 | USP, INN           |
| GAMBOGIC ACID             | 2752-65-0                       | C38H44O8      | 628.77 | experimental       |
| gamma-AMINOBUTYRIC ACID   | 56-12-2                         | C4H9NO2       | 103.12 | JAN                |
| GATIFLOXACIN              | 160738-57-8                     | C19H22FN3O4   | 375.40 | USAN, INN          |
| GEDUNIN                   | 2753-30-2                       | C28H34O7      | 482.58 | experimental       |
| GEMFIBROZIL               | 25812-30-0                      | C15H22O3      | 250.34 | USP, INN, BAN      |
| GEMIFLOXACIN MESYLATE     | 204519-65-3                     | C19H24FN5O7S  | 485.49 | USAN               |
| GENETICIN                 | 108321-42-2, 49863-47-          | C20H44N4O18S2 | 692.72 | experimental       |
| GENTAMICIN SULFATE        | 1405-41-0, 1403-66-3            | C21H45N5O11S  | 575.68 | USP, INN, BAN, JAN |
| GENTIAN VIOLET            | 548-62-9                        | C25H30ClN3    | 407.99 | USP, INN, BAN, JAN |
| GINKGOLIC ACID            | 22910-60-7                      | C22H34O3      | 346.51 | experimental       |
| GLAFENINE                 | 3820-67-5                       | C19H17ClN2O4  | 372.81 | INN, JAN           |
| GLICLAZIDE                | 21187-98-4                      | C15H21N3O3S   | 323.42 | INN, BAN, JAN      |
| GLUCONOLACTONE            | 90-80-2                         | C6H10O6       | 178.14 | USP                |
| GLUCOSAMINE HYDROCHLORIDE | 3416-24-8                       | C6H14ClNO5    | 215.64 | NF-XXI             |
| GLUTATHIONE               | 70-18-8                         | C10H17N3O6S   | 307.33 | JAN                |
| GLYBURIDE                 | 10238-21-8                      | C23H28ClN3O5S | 494.01 | USP, INN, BAN, JAN |
| GLYCYLLEUCYLPHENYLALANINE |                                 | C17H25N3O4    | 335.41 | experimental       |
| GOSSYPOL                  | 303-45-7                        | C30H30O8      | 518.57 | experimental       |
| GRISEOFULVIN              | 126-07-8                        | C17H17ClO6    | 352.77 | USP, INN, BAN, JAN |
| GUAIFENESIN               | 93-14-1                         | C10H14O4      | 198.22 | USP, INN, BAN, JAN |
| GUANABENZ ACETATE         | 23256-50-0                      | C10H12Cl2N4O2 | 291.14 | USP, JAN           |
| GUANETHIDINE SULFATE      | 60-02-6, 55-65-2 [guanethidine] | C10H24N4O4S   | 296.39 | USP, INN, BAN      |
| GUANIDINE CARBONATE       | 593-85-1                        | C2H7N3O3      | 121.10 | experimental       |
| GUVACINE HYDROCHLORIDE    | 498-96-4                        | C6H10ClNO2    | 163.61 | experimental       |
| HALAZONE                  | 80-13-7                         | C7H5Cl2NO4S   | 270.09 | USP, INN           |
| HALCINONIDE               | 3093-35-4                       | C24H32ClFO5   | 454.97 | USP, INN, BAN, JAN |
| HALOPERIDOL               | 52-86-8                         | C21H23ClFNO2  | 375.87 | USP, INN, BAN, JAN |
| HARMALINE                 | 304-21-2                        | C13H14N2O     | 214.27 | experimental       |
| HARMALOL HYDROCHLORIDE    | 6028-07-5                       | C12H13ClN2O   | 236.70 | experimental       |
| HARMINE                   | 442-51-3                        | C13H12N2O     | 212.25 | experimental       |
| HARMOL HYDROCHLORIDE      | 40580-83-4                      | C12H11ClN2O   | 234.69 | experimental       |
| HECOGENIN                 | 467-55-0                        | C27H42O4      | 430.63 | experimental       |
| HETACILLIN POTASSIUM      | 5321-32-4, 3511-16-8            | C19H22KN3O4S  | 427.57 | USP-XIII, JAN      |
| HEXACHLOROPHENE           | 70-30-4                         | C13H6Cl6O2    | 406.91 | USP, INN, BAN      |

Source:  
MicroSource Discovery Systems, Inc.

Kraft et al., TableS1  
NINDS Custom Collection II  
Compound Library

Yellow: Fascin-pathway enhancer  
Blue: Fascin-pathway blocker  
Green: Both

|                              |                                 |               |        |                     |
|------------------------------|---------------------------------|---------------|--------|---------------------|
| HEXAMETHONIUM BROMIDE        | 55-97-0, 60-26-4                | C12H30Br2N2   | 362.19 | INN, BAN, JAN       |
| HEXESTROL                    | 5635-50-7                       | C18H22O2      | 270.37 | NF-XI, INN          |
| HEXETIDINE                   | 141-94-6                        | C21H45N3      | 339.61 | BAN                 |
| HEXYLRESORCINOL              | 136-77-6                        | C12H18O2      | 194.28 | USP, BAN            |
| HISTAMINE DIHYDROCHLORIDE    | 51-45-6 [histamine]             | C5H11Cl2N3    | 184.07 | USAN                |
| HOMATROPINE BROMIDE          | 51-56-9, 87-00-3 [homatropine]  | C16H22BrNO3   | 356.26 | USP, JAN            |
| HOMATROPINE METHYLBROMIDE    | 80-49-9, 87-00-3 [homatropine]  | C17H24BrNO3   | 370.29 | USP, INN, BAN       |
| HUPERZINE A                  | 102518-79-6                     | C15H18N2O     | 242.32 | experimental        |
| HYCANTHONE                   | 3105-97-3                       | C20H24N2O2S   | 356.49 | USAN, INN           |
| HYDRALAZINE HYDROCHLORIDE    | 304-20-1, 86-54-4 [hydralazine] | C8H9ClN4      | 196.64 | USP, INN, BAN       |
| HYDROCHLOROTHIAZIDE          | 58-93-5                         | C7H8ClN3O4S2  | 297.74 | USP, INN, BAN, JAN  |
| HYDROCORTISONE               | 50-23-7                         | C21H30O5      | 362.47 | USP, INN, BAN, JAN  |
| HYDROCORTISONE ACETATE       | 50-03-3                         | C23H32O6      | 404.51 | USP, INN, BAN, JAN  |
| HYDROCORTISONE BUTYRATE      | 13609-67-1                      | C25H36O6      | 432.56 | USP, INN, BAN, JAN  |
| HYDROCORTISONE HEMISUCCINATE | 83784-20-7, 2203-97-6           | C25H34O8      | 462.54 | USP, JAN            |
| HYDROFLUMETHIAZIDE           | 135-09-1                        | C8H8F3N3O4S2  | 331.29 | USP, INN, BAN, JAN  |
| HYDROQUINIDINE               | 1435-55-8                       | C20H26N2O2    | 326.44 | INN                 |
| HYDROQUINONE                 | 123-31-9                        | C6H6O2        | 110.11 | USP                 |
| HYDROXYCHLOROQUINE SULFATE   | 747-36-4, 118-42-3              | C18H28ClN3O5S | 433.96 | USP-XXII, INN       |
| HYDROXYPROGESTERONE CAPROATE | 630-56-8, 68-96-2               | C27H40O4      | 428.62 | USP, INN, JAN       |
| HYDROXYTACRINE MALEATE       |                                 | C17H18N2O5    | 330.34 | experimental        |
| HYDROXYUREA                  | 127-07-1                        | CH4N2O2       | 76.06  | USP, INN, BAN       |
| HYDROXYZINE PAMOATE          | 10246-75-0, 68-88-2             | C44H43ClN2O8  | 763.29 | USP, JAN            |
| HYOSCYAMINE                  | 101-31-5                        | C17H23NO3     | 289.38 | USP, BAN            |
| IBUPROFEN                    | 15687-27-1, 58560-75-1 [(+/-)]  | C13H18O2      | 206.29 | USP, INN, BAN, JAN  |
| ICARIIN                      | 489-32-7                        | C33H40O15     | 676.68 | experimental        |
| IMIDACLOPRID                 | 13826-41-3                      | C10H11ClN4O2  | 254.68 | agricultural use    |
| IMIPRAMINE HYDROCHLORIDE     | 113-52-0, 50-49-7 [imipramine]  | C19H25ClN2    | 316.88 | USP, INN, BAN, JAN  |
| INDAPAMIDE                   | 26807-65-8                      | C16H16ClN3O3S | 365.84 | USP, INN, BAN, JAN  |
| INDOLE-2-CARBOXYLIC ACID     | 1477-50-5                       | C9H7NO2       | 161.16 | experimental        |
| INDOLE-3-CARBINOL            | 700-06-1                        | C9H9NO        | 147.18 | experimental        |
| INDOMETHACIN                 | 53-86-1                         | C19H16ClNO4   | 357.80 | USP, INN, BAN, JAN  |
| INDOPROFEN                   | 31842-01-0                      | C17H15NO3     | 281.31 | USAN, INN, BAN      |
| IODIPAMIDE                   | 606-17-7, 2618-26-0             | C12H11I3N2O4  | 627.95 | USAN, INN, BAN, JAN |
| IDOQUINOL                    | 83-73-8                         | C9H5I2NO      | 396.96 | USP, INN, BAN       |
| IOPANIC ACID                 | 96-83-3                         | C11H12I3NO2   | 570.94 | USP, INN, BAN, JAN  |
| IPRATROPIUM BROMIDE          | 66985-17-9, 22254-24-6          | C20H30BrNO3   | 412.37 | USAN, INN, BAN, JAN |
| IPRONIAZID SULFATE           | 54-92-2, 305-33-9 [as]          | C9H15N3O5S    | 277.30 | INN, BAN            |
| IRBESARTAN                   | 138402-11-6                     | C25H28N6O     | 428.54 | USP, INN, BAN       |
| ISOBUTYLMETHYLXANTHINE       |                                 | C10H14N4O2    | 222.25 | experimental        |
| ISOLIQURITIGENIN             | 961-29-5                        | C15H12O4      | 256.26 | experimental        |



Source:  
MicroSource Discovery Systems, Inc.

Kraft et al., TableS1  
NINDS Custom Collection II  
Compound Library

Yellow: Fascin-pathway enhancer  
Blue: Fascin-pathway blocker  
Green: Both

|                             |                          |                |        |                     |
|-----------------------------|--------------------------|----------------|--------|---------------------|
| ISONIAZID                   | 54-85-3                  | C6H7N3O        | 137.14 | USP, INN, BAN, JAN  |
| ISOPROPAMIDE IODIDE         | 71-81-8, 7492-32-2       | C23H33IN2O     | 480.44 | USP, INN, BAN, JAN  |
| ISOPROTERENOL HYDROCHLORIDE | 51-30-9, 7683-59-2       | C11H18ClNO3    | 247.72 | USP, INN, BAN, JAN  |
| ISORESERPINE                | 482-85-9                 | C33H40N2O9     | 608.69 | experimental        |
| ISOSORBIDE DINITRATE        | 87-33-2                  | C6H8N2O8       | 236.14 | USP, INN, BAN, JAN  |
| ISOXICAM                    | 34552-84-6               | C14H13N3O5S    | 335.34 | USAN, INN, BAN      |
| ISOXSUPRINE HYDROCHLORIDE   | 579-56-6, 395-28-8       | C18H24ClNO3    | 337.85 | USP, INN, BAN, JAN  |
| JUGLONE                     | 481-39-0                 | C10H6O3        | 174.16 | experimental        |
| KAINIC ACID                 | 487-79-6                 | C10H15NO4      | 213.24 | INN, JAN            |
| KANAMYCIN SULFATE           | 25389-94-0, 133-92-6     | C18H38N4O15S   | 582.59 | USP, INN, BAN, JAN  |
| KETOCONAZOLE                | 65277-42-1               | C26H28Cl2N4O4  | 531.44 | USP, INN, BAN, JAN  |
| KETOPROFEN                  | 22071-15-4               | C16H14O3       | 254.29 | USP, INN, BAN, JAN  |
| KETOROLAC TROMETHAMINE      | 74103-07-4, 74103-06-3   | C19H24N2O6     | 376.41 | USP, INN, BAN       |
| KETOTIFEN FUMARATE          | 34580-14-8, 34580-13-7   | C23H23NO5S     | 425.51 | USAN, INN, BAN, JAN |
| KINETIN                     | 525-79-1                 | C10H9N5O       | 215.22 | experimental        |
| KOJIC ACID                  | 501-30-4                 | C6H6O4         | 142.11 | experimental        |
| KYNURENIC ACID              |                          | C10H7NO3       | 189.17 | experimental        |
| LABELALOL HYDROCHLORIDE     | 32780-64-6, 36894-69-6   | C19H25ClN2O3   | 364.88 | USP, INN, BAN, JAN  |
| LACTULOSE                   | 4618-18-2                | C12H22O11      | 342.30 | USP, INN, BAN, JAN  |
| LANSOPRAZOLE                | 103577-45-3              | C16H14F3N3O2S  | 369.37 | USP, INN, BAN       |
| LAPACHOL                    | 84-79-7                  | C15H14O3       | 242.28 | experimental        |
| LASALOCID SODIUM            | 25999-31-9; 25999-20-6?  | C34H53NaO8     | 612.79 | USAN, INN, BAN      |
| LEFUNOMIDE                  | 75706-12-6               | C12H9F3N2O2    | 270.21 | USAN, INN, BAN      |
| LEUCINE ENKEPHALIN          |                          | C28H37N5O7     | 555.64 | experimental        |
| LEUCOVORIN CALCIUM          | 1492-18-8                | C20H21CaN7O7   | 511.51 | USP, INN, BAN, JAN  |
| LEVAMISOLE HYDROCHLORIDE    | 16595-80-5, 14769-73-4   | C11H13ClN2S    | 240.76 | USP, INN, BAN       |
| LEVODOPA                    | 59-92-7                  | C9H11NO4       | 197.19 | USP, INN, BAN, JAN  |
| LEVOFLOXACIN                | 138199-71-0              | C18H20FN3O4    | 361.38 | USAN, INN, BAN, JAN |
| LEVONORDEFRIN               | 829-74-3, 18829-78-2     | C9H13NO3       | 183.21 | USP, INN            |
| LIDOCAINE HYDROCHLORIDE     | 6108-05-0, 73-78-9       | C14H23ClN2O    | 270.81 | USP, INN, JAN       |
| LINCOMYCIN HYDROCHLORIDE    | 7179-49-9, 859-18-7      | C18H35ClN2O6S  | 443.01 | USAN, INN, BAN      |
| LIOTHYRONINE SODIUM         | 55-06-1, 6893-02-3       | C15H11I3NNaO4  | 672.96 | USP, BAN, JAN       |
| LISINAPRIL                  | 83915-83-7, 76547-98-3   | C21H31N3O5     | 405.50 | USP, INN, BAN, JAN  |
| L-LEUCYL-L-ALANINE          | 7298-84-2                | C9H18N2O3      | 202.26 | experimental        |
| LOBELINE HYDROCHLORIDE      | 90-69-7                  | C22H28ClNO2    | 373.93 | INN, BAN, JAN       |
| LOMEFLOXACIN HYDROCHLORIDE  | 98079-52-8, 98079-51-7   | C17H20ClF2N3O3 | 387.82 | USAN, JAN           |
| LOPERAMIDE HYDROCHLORIDE    | 34552-83-5, 53179-11-6   | C29H34Cl2N2O2  | 513.51 | USP, INN, BAN, JAN  |
| LORATADINE                  | 79794-75-5               | C22H23ClN2O2   | 382.89 | USP, INN, BAN       |
| LOSARTAN                    | 124750-99-8, 114798-26-4 | C22H23ClN6O    | 422.92 | USAN, INN, BAN      |
| LOVASTATIN                  | 75330-75-5               | C24H36O5       | 404.55 | USP, INN, BAN       |
| LOXAPINE SUCCINATE          | 27833-64-3, 1977-10-2    | C22H24ClN3O5   | 445.91 | USP                 |

Source:  
MicroSource Discovery Systems, Inc.

Kraft et al., TableS1  
NINDS Custom Collection II  
Compound Library

Yellow: Fascin-pathway enhancer  
Blue: Fascin-pathway blocker  
Green: Both

|                                   |                                |                  |               |                           |
|-----------------------------------|--------------------------------|------------------|---------------|---------------------------|
| L-PHENYLALANINOL                  | 3182-95-4                      | C9H13NO          | 151.21        | experimental              |
| LUPININE                          | 486-70-4                       | C10H19NO         | 169.27        | experimental              |
| LYSYLPHENYLALANYLTYSOSINE         |                                | C24H32N4O5       | 456.55        | experimental              |
| LYSYL-TYROSYL-LYSINE ACETATE      |                                | C23H39N5O7       | 497.60        | experimental              |
| MADECASSIC ACID                   | 18449-41-7                     | C30H48O6         | 504.71        | experimental              |
| MAFENIDE HYDROCHLORIDE            | 138-39-6                       | C7H11CIN2O2S     | 222.69        | USAN, INN, BAN            |
| MAPROTILINE HYDROCHLORIDE         | 10347-81-6, 10262-69-8         | C20H24CIN        | 313.87        | USAN, INN, BAN            |
| MEBENDAZOLE                       | 31431-39-7                     | C16H13N3O3       | 295.30        | USP, INN, BAN, JAN        |
| MEBEVERINE HYDROCHLORIDE          | 2753-45-9, 3625-06-7           | C25H36CINO5      | 466.02        | USAN, INN, BAN            |
| MEBHLYDROLIN NAPHTHALENESULFONATE | 524-81-2                       | C29H28N2O6S2     | 564.68        | INN, BAN, JAN             |
| MECAMYLAMINE HYDROCHLORIDE        | 826-39-1, 60-40-2              | C11H22CIN        | 203.76        | USP, INN, BAN             |
| <b>MECHLORETHAMINE</b>            | <b>55-86-7, 51-75-2</b>        | <b>C5H11CI2N</b> | <b>156.06</b> | <b>USP, INN, BAN, JAN</b> |
| MECLIZINE HYDROCHLORIDE           | 31884-77-2, 1104-22-9          | C25H29CIN2       | 463.88        | USP, INN, BAN, JAN        |
| MECLOCYCLINE SULFOSALICYLATE      | 73816-42-9, 2013-58-3          | C29H27CIN2O14S   | 695.06        | USAN, INN, BAN            |
| MECLOFENAMATE SODIUM              | 6385-02-0                      | C14H10CI2NNaO2   | 318.14        | USP                       |
| MEDROXYPROGESTERONE ACETATE       | 71-58-9, 520-85-4              | C24H34O4         | 386.54        | USP, INN, BAN, JAN        |
| MEDRYSONE                         | 2668-66-8                      | C22H32O3         | 344.50        | USAN, INN                 |
| MEFENAMIC ACID                    | 61-68-7                        | C15H15NO2        | 241.29        | USP, INN, BAN, JAN        |
| MEFEXAMIDE                        | 1227-61-8                      | C15H25CIN2O3     | 316.83        | USAN, INN                 |
| MEFLOQUINE                        | 53230-10-7                     | C17H16F6N2O      | 378.32        | USAN, INN, BAN            |
| MEGESTROL ACETATE                 | 595-33-5, 3562-63-8            | C24H32O4         | 384.52        | USP, INN, BAN             |
| MELATONIN                         | 73-31-4                        | C13H16N2O2       | 232.28        | experimental              |
| MELOXICAM                         | 71125-38-7                     | C14H13N3O4S2     | 351.41        | USAN, INN, BAN            |
| MEMANTINE HYDROCHLORIDE           | 19982-08-2                     | C12H22CIN        | 215.77        | USAN                      |
| MENADIONE                         | 58-27-5                        | C11H8O2          | 172.19        | USP, BAN                  |
| MENTHOL(-)                        | 1490-04-6                      | C10H20O          | 156.27        | USP, JAN                  |
| MEPENZOLATE BROMIDE               | 76-90-4, 25990-43-6            | C21H26BrNO3      | 420.35        | USP-XXIII, INN, BAN       |
| <b>MEPHENESIN</b>                 | <b>59-47-2</b>                 | <b>C10H14O3</b>  | <b>182.22</b> | <b>NF-XII, INN, BAN</b>   |
| MEPHENTERMINE SULFATE             | 1212-72-2, 6190-60-9           | C11H19NO4S       | 261.34        | USP-XXIII, INN, BAN       |
| MEPIVACAINE HYDROCHLORIDE         | 1722-62-9, 96-88-8             | C15H23CIN2O      | 282.82        | USP, INN, BAN, JAN        |
| MERBROMIN                         | 129-16-8                       | C20H8Br2HgNa2O6  | 750.66        | NF-XII, INN, BAN          |
| MERCAPTAMINE HYDROCHLORIDE        | 60-23-1                        | C2H8CINS         | 113.61        | INN, BAN                  |
| MERCAPTOPYRINE                    | 6112-76-1, 50-44-2 [anhydrous] | C5H4N4S          | 152.18        | USP, INN, BAN, JAN        |
| MESNA                             | 19767-45-4, 3375-50-6 [2-      | C2H5NaO3S2       | 164.18        | USAN, INN, BAN            |
| METAMPICILLIN SODIUM              | 6489-97-0                      | C17H18N3NaO4S    | 383.40        | INN                       |
| METAPROTERENOL                    | 586-06-1, 5874-97-5            | C11H17NO3        | 211.26        | USP, JAN                  |
| <b>METARAMINOL BITARTRATE</b>     | <b>33402-03-8</b>              | <b>C13H19NO8</b> | <b>317.30</b> | <b>USP, INN, BAN, JAN</b> |
| METAXALONE                        | 1665-48-1                      | C12H15NO3        | 221.26        | USAN, INN, BAN            |
| METERGOLINE                       | 17692-51-2                     | C25H29N3O2       | 403.53        | INN, BAN                  |
| METHACHOLINE CHLORIDE             | 62-51-1, 55-92-5               | C8H18CINO2       | 195.69        | USP, INN, BAN             |
| METHACYCLINE HYDROCHLORIDE        | 3963-95-9, 914-00-1            | C22H23CIN2O8     | 478.89        | USAN, INN, BAN            |

Source:  
MicroSource Discovery Systems, Inc.

Kraft et al., TableS1  
NINDS Custom Collection II  
Compound Library

Yellow: Fascin-pathway enhancer  
Blue: Fascin-pathway blocker  
Green: Both

|                                       |                        |                |        |                     |
|---------------------------------------|------------------------|----------------|--------|---------------------|
| METHAPYRILENE HYDROCHLORIDE           | 135-23-9, 91-80-5      | C14H20ClN3S    | 297.85 | USP-XX, INN, BAN    |
| METHAZOLAMIDE                         | 554-57-4               | C5H8N4O3S2     | 236.27 | USP, INN, BAN, JAN  |
| METHENAMINE                           | 100-97-0               | C6H12N4        | 140.19 | USP, INN, JAN       |
| METHICILLIN SODIUM                    | 7246-14-2, 132-92-3    | C17H19N2NaO6S  | 402.40 | USAN, INN, BAN, JAN |
| METHIMAZOLE                           | 60-56-0                | C4H6N2S        | 114.17 | USP, INN, BAN, JAN  |
| METHIONYL-LEUCYLPHENYLALANINE ACETATE |                        | C22H35N3O6S    | 469.60 | experimental        |
| METHIOTHEPIN MALEATE                  | 20229-30-5             | C24H28N2O4S2   | 472.63 | INN                 |
| METHOCARBAMOL                         | 532-03-6               | C11H15NO5      | 241.25 | USP, INN, BAN, JAN  |
| METHOTREXATE                          | 59-05-2                | C20H22N8O5     | 454.45 | USP, INN, BAN, JAN  |
| METHOXAMINE HYDROCHLORIDE             | 61-16-5, 390-28-3      | C11H18ClNO3    | 247.72 | USP-XXII, INN, BAN, |
| METHOXSALEN                           | 298-81-7               | C12H8O4        | 216.20 | USP, BAN, JAN       |
| METHOXYAMINE HYDROCHLORIDE            | 593-56-6               | CH6ClNO        | 83.52  | experimental        |
| METHSCOPOLAMINE BROMIDE               | 155-41-9               | C18H24BrNO4    | 398.30 | USP-XXII, BAN, JAN  |
| METHYLBENZETHONIUM CHLORIDE           | 1320-44-1, 25155-18-4  | C28H44ClNO2    | 462.12 | USP, INN, BAN       |
| METHYLDOPA                            | 41372-08-1, 555-30-6   | C10H13NO4      | 211.22 | USP, INN, BAN, JAN  |
| METHYLERGONOVINE MALEATE              | 57432-61-8, 7054-07-1  | C24H29N3O6     | 455.52 | USP, INN, BAN, JAN  |
| METHYLPREDNISOLONE                    | 83-43-2                | C22H30O5       | 374.48 | USP, INN, BAN, JAN  |
| METHYLTHIOURACIL                      | 56-04-2                | C5H6N2OS       | 142.18 | USP-XXI, INN        |
| METOCLOPRAMIDE HYDROCHLORIDE          | 54143-57-6, 7232-21-5  | C14H23Cl2N3O2  | 336.26 | USP, INN, BAN, JAN  |
| METOLAZONE                            | 17560-51-9             | C16H16ClN3O3S  | 365.84 | USP, INN, BAN, JAN  |
| METOPROLOL TARTRATE                   | 56392-17-7, 37350-58-6 | C19H31NO9      | 417.46 | USP, JAN            |
| METRONIDAZOLE                         | 443-48-1, 69198-10-3   | C6H9N3O3       | 171.16 | USP, INN, BAN, JAN  |
| MEXAMINE                              | 608-07-1               | C11H15ClN2O    | 226.71 | experimental        |
| MICONAZOLE NITRATE                    | 22832-87-7, 22916-47-8 | C18H15Cl4N3O4  | 479.15 | USP, JAN            |
| MIDODRINE HYDROCHLORIDE               | 3092-17-9, 42794-76-3  | C12H19ClN2O4   | 290.75 | USAN, INN, BAN, JAN |
| MIGLITOL                              | 72432-03-2             | C8H17NO5       | 207.23 | USAN, INN, BAN      |
| MILTEFOSINE                           | 58066-85-6             | C21H46NO4P     | 407.58 | INN, BAN            |
| MIMOSINE                              |                        | C8H10N2O4      | 198.18 | experimental        |
| MINAPRINE HYDROCHLORIDE               | 25953-17-7, 25905-77-5 | C17H24Cl2N4O   | 371.31 | USAN                |
| MINOXIDIL                             | 38304-91-5             | C9H15N5O       | 209.25 | USP, INN, BAN       |
| MITOXANTHRONE HYDROCHLORIDE           | 70476-82-3, 65271-80-9 | C22H30Cl2N4O6  | 517.41 | USP, INN, BAN, JAN  |
| MIZORIBINE                            | 50924-49-7             | C9H13N3O6      | 259.22 | INN, JAN            |
| MODAFINIL                             | 68693-11-8             | C15H15NO2S     | 273.36 | USAN, INN, BAN      |
| MOLSIDOMINE                           | 25717-80-0             | C9H14N4O4      | 242.24 | USAN, INN, BAN, JAN |
| MONENSIN SODIUM (monensin A is shown) | 22373-78-0, 17090-79-8 | C37H63NaO10    | 690.90 | USP, INN, BAN       |
| MONOCROTALINE                         | 315-22-0               | C16H23NO6      | 325.36 | experimental        |
| MORANTEL CITRATE                      | 26155-31-7, 20574-50-9 | C18H24N2O7S    | 412.47 | USAN, INN, BAN      |
| MORIN                                 | 480-16-0               | C15H10O7       | 302.24 | experimental        |
| MOXALACTAM DISODIUM                   | 8031-09-2              | C20H18N6Na2O9S | 564.44 | USAN, INN, BAN      |
| MOXIFLOXACIN HYDROCHLORIDE            | 186826-86-8            | C23H29ClFN3O4  | 465.96 | USAN                |
| MYCOPHENOLIC ACID                     | 24280-93-1             | C17H20O6       | 320.35 | USAN, INN, BAN      |

Source:  
MicroSource Discovery Systems, Inc.

Kraft et al., TableS1  
NINDS Custom Collection II  
Compound Library

Yellow: Fascin-pathway enhancer  
Blue: Fascin-pathway blocker  
Green: Both

|                                                          |                        |                |        |                     |
|----------------------------------------------------------|------------------------|----------------|--------|---------------------|
| N- (3-TRIFLUOROMETHYLPHENYL)PIPERAZINE HYDROCHLORIDE     |                        | C11H14ClF3N2   | 266.70 | experimental        |
| N- (9-FLUORENYLMETHOXYCARBONYL)-L-LEUCINE                | 35661-60-0             | C21H23NO4      | 353.42 | experimental        |
| N (g)-NITRO-L-ARGININE                                   | 2149-70-4              | C6H13N5O4      | 219.20 | experimental        |
| N,N-HEXAMETHYLENEAMILORIDE                               |                        | C12H18ClN7O    | 311.78 | experimental        |
| NABUMETONE                                               | 42924-53-8             | C15H16O2       | 228.29 | USP, INN, BAN, JAN  |
| N-ACETYLASPARTIC ACID                                    | 997-55-7               | C6H9NO5        | 175.14 | experimental        |
| N-ACETYLNEURAMIC ACID                                    | 131-48-6               | C11H19NO9      | 309.28 | experimental        |
| N-ACETYLPROLINE                                          |                        | C7H11NO3       | 157.17 | experimental        |
| NADOLOL                                                  | 42200-33-9             | C17H27NO4      | 309.41 | USP, INN, BAN, JAN  |
| NAFCILLIN SODIUM                                         | 7177-50-6, 985-16-0    | C21H21N2NaO5S  | 436.47 | USP, INN, BAN       |
| NAFRONYL OXALATE                                         | 3200-06-4, 31329-57-4  | C26H35NO7      | 473.57 | USAN, INN, BAN      |
| NALBUPHINE HYDROCHLORIDE                                 | 23277-43-2, 20594-83-6 | C21H28ClNO4    | 393.91 | USAN, INN, BAN      |
| NALIDIXIC ACID                                           | 389-08-2, 3374-05-8    | C12H12N2O3     | 232.24 | USP, INN, BAN, JAN  |
| NALOXONE HYDROCHLORIDE                                   | 357-08-4, 51481-60-8   | C19H22ClNO4    | 363.84 | USP, INN, BAN, JAN  |
| NALTREXONE HYDROCHLORIDE                                 | 16676-29-2, 16590-41-3 | C20H23NO4      | 341.41 | USP                 |
| N-AMINOHEXYL-5-CHLORO-1-NAPHTHALENESULFONAMIDE           |                        | C16H22Cl2N2O2S | 377.34 | experimental        |
| NAPHAZOLINE HYDROCHLORIDE                                | 550-99-2, 835-31-4     | C14H15ClN2     | 246.74 | USP, INN, BAN, JAN  |
| NAPROXEN(+)                                              | 22204-53-1             | C14H14O3       | 230.27 | USP, INN, BAN, JAN  |
| NAPROXOL                                                 | 26159-36-4             | C14H16O2       | 216.28 | USAN, INN           |
| NARASIN                                                  | 55134-13-9             | C43H72O11      | 765.05 | USP, INN, BAN       |
| NARINGENIN                                               | 480-41-1               | C15H12O5       | 272.26 | experimental        |
| NARINGIN                                                 | 10236-47-2             | C27H32O14      | 580.55 | experimental        |
| NATEGLINIDE                                              | 105816-04-4            | C19H27NO3      | 317.43 | USAN, INN, BAN      |
| N-CHLOROETHYL-N-ETHYL-2'-METHYLBENZYLAMINE HYDROCHLORIDE |                        | C12H19Cl2N     | 248.20 | experimental        |
| NEFOPAM                                                  | 23327-57-3, 13669-70-0 | C17H19NO       | 253.35 | USAN, INN, BAN      |
| NEOHESPERIDIN DIHYDROCHALCONE                            |                        | C28H36O15      | 612.59 | experimental        |
| NEOMYCIN SULFATE                                         | 1405-10-3, 1404-04-2   | C23H48N6O17S   | 712.73 | USP, JAN            |
| NEOSTIGMINE BROMIDE                                      | 114-80-7, 59-99-4      | C12H19BrN2O2   | 303.20 | USP, INN, BAN, JAN  |
| NEROL                                                    | 106-25-2               | C10H18O        | 154.25 | experimental        |
| N-FORMYLMETHIONYL-LEUCYLPHENYLALANINE                    |                        | C21H31N3O5S    | 437.56 | experimental        |
| N-FORMYLMETHIONYLPHENYLALANINE                           | 22008-60-2             | C15H20N2O4S    | 324.40 | experimental        |
| Ng-METHYL-L-ARGININE ACETATE                             |                        | C9H20N4O4      | 248.28 | experimental        |
| N-HISTIDYL-2-AMINONAPHTHALENE (betaNA)                   | 7424-15-9              | C16H16N4O      | 280.33 | experimental        |
| N-HYDROXYMETHYLNICOTINAMIDE                              | 3569-99-1              | C7H8N2O2       | 152.15 | experimental        |
| NIACIN                                                   | 59-67-6                | C6H5NO2        | 123.11 | USP, INN, JAN       |
| NICARDIPINE HYDROCHLORIDE                                | 54527-84-3, 55985-32-5 | C26H30ClN3O6   | 516.00 | USAN, INN, BAN, JAN |
| NICERGOLINE                                              | 27848-84-6             | C24H26BrN3O3   | 484.40 | USAN, INN, BAN, JAN |
| NICOTINE DITARTRATE                                      | 65-31-6                | C18H26N2O12    | 462.41 | USAN                |
| NICOTINYL TARTRATE                                       | 100-55-0               | C10H13NO7      | 259.22 | USAN, JAN           |
| NIFEDIPINE                                               | 21829-25-4             | C17H18N2O6     | 346.34 | USP, INN, BAN, JAN  |
| NIFENAZONE                                               | 2139-47-1              | C17H16N4O2     | 308.34 | INN, BAN            |

Source:  
MicroSource Discovery Systems, Inc.

Kraft et al., TableS1  
NINDS Custom Collection II  
Compound Library

Yellow: Fascin-pathway enhancer  
Blue: Fascin-pathway blocker  
Green: Both

|                                |                                   |               |        |                        |
|--------------------------------|-----------------------------------|---------------|--------|------------------------|
| NIGERICIN SODIUM               | 28380-24-7                        | C40H67NaO11   | 746.96 | experimental           |
| NILUTAMIDE                     | 63612-50-0                        | C12H10F3N3O4  | 317.23 | USAN, INN, BAN         |
| NIMESULIDE                     | 51803-78-2                        | C13H12N2O5S   | 308.31 | INN, BAN               |
| NIMODIPINE                     | 66085-59-4                        | C21H26N2O7    | 418.45 | USP, INN, BAN          |
| NIMUSTINE                      | 42471-28-3                        | C9H13CIN6O2   | 272.70 | INN, JAN               |
| NIPECOTIC ACID                 | 498-95-3                          | C6H11NO2      | 129.16 | experimental           |
| NITRENDIPINE                   | 84845-75-0                        | C18H20N2O6    | 360.37 | USAN, INN, BAN, JAN    |
| NITROFURANTOIN                 | 67-20-9, 54-87-5 [nitrofurantoin] | C8H6N4O5      | 238.16 | USP, INN, BAN, JAN     |
| NITROFURAZONE                  | 59-87-0                           | C6H6N4O4      | 198.14 | USP, INN, BAN          |
| NITROMIDE                      | 121-81-3                          | C7H5N3O5      | 211.14 | USAN                   |
| NOMIFENSINE MALEATE            | 32795-47-4, 24526-64-5            | C20H22N2O4    | 354.41 | USAN, INN, BAN         |
| NORCANTHARIDIN                 |                                   | C8H8O4        | 168.15 | experimental           |
| NOREPINEPHRINE                 | 69815-49-2, 51-40-1               | C8H11NO3      | 169.18 | USP, INN, BAN          |
| NORETHINDRONE ACETATE          | 51-98-9                           | C22H28O3      | 340.47 | USP                    |
| NORETHYNODREL                  | 68-23-5                           | C20H26O2      | 298.43 | USP                    |
| NORFLOXACIN                    | 70458-96-7                        | C16H18FN3O3   | 319.34 | USP, INN, BAN, JAN     |
| NORGESTREL                     | 6533-00-2                         | C21H28O2      | 312.46 | USP, INN, BAN, JAN     |
| NORHARMAN                      | 244-63-3                          | C11H8N2       | 168.20 | experimental           |
| NORTRIPTYLINE                  | 894-71-3, 72-69-5 [nortriptyline] | C19H21N       | 263.39 | USP, INN, BAN, JAN     |
| NOSCAPINE HYDROCHLORIDE        | 912-60-7, 128-62-1 [noscapine]    | C22H24CINO7   | 449.89 | USP, INN, BAN, JAN     |
| NOVOBIOCIN SODIUM              | 1476-53-5, 303-81-1               | C31H35N2NaO11 | 634.62 | USP                    |
| NYLIDRIN HYDROCHLORIDE         | 1400-61-9                         | C19H26CINO2   | 335.88 | USP-XII, INN, BAN      |
| NYSTATIN                       | 114-90-9                          | C47H75NO17    | 926.12 | USP, INN, BAN, JAN     |
| OCTOPAMINE HYDROCHLORIDE       | 104-14-3                          | C8H12CINO2    | 189.64 | INN                    |
| OFLOXACIN                      | 82419-36-1                        | C18H20FN3O4   | 361.38 | USP, INN, BAN, JAN     |
| OLEANDOMYCIN PHOSPHATE         | 3922-90-5 (base)                  | C35H64NO16P   | 785.87 | NF-XIII, INN, BAN, JAN |
| OLMESARTAN MEDOXOMIL           | 144689-63-4                       | C29H30N6O6    | 558.60 | USAN, INN, BAN         |
| ORLISTAT                       | 96829-58-2                        | C29H53NO5     | 495.75 | USAN, INN, BAN         |
| ORPHENADRINE CITRATE           | 4682-36-4, 83-98-7                | C24H31NO8     | 461.52 | USP, INN, BAN          |
| OUABAIN                        | 11018-89-6, 630-60-4              | C29H44O12     | 584.67 | USP-XX, JAN            |
| OXACILLIN SODIUM               | 7240-38-2, 1173-88-2              | C19H18N3NaO5S | 423.43 | USP, INN, BAN, JAN     |
| OXAPROZIN                      | 21256-18-8                        | C18H15NO3     | 293.33 | USP, INN, BAN, JAN     |
| OXCARBAZEPINE                  | 28721-07-5                        | C15H12N2O2    | 252.28 | USAN, INN, BAN         |
| OXFENDAZOLE                    | 53716-50-0                        | C15H13N3O3S   | 315.35 | USP, INN, BAN          |
| OXICONAZOLE NITRATE            | 64211-46-7                        | C18H14Cl4N4O4 | 492.15 | USAN, INN, BAN, JAN    |
| OXIDOPAMINE HYDROCHLORIDE      | 1199-18-4                         | C8H12CINO3    | 205.64 | USAN, INN              |
| OXOTREMORINE SESQUIFUMARATE    | 17360-35-9                        | C16H22N2O5    | 322.36 | experimental           |
| OXYBENZONE                     | 131-57-7                          | C14H12O3      | 228.25 | USP, INN               |
| OXYMETAZOLINE HYDROCHLORIDE    | 2315-02-8, 1491-59-4              | C16H25CIN2O   | 296.84 | USP, INN, BAN, JAN     |
| OXYPHENBUTAZONE                | 7081-38-1, 129-20-4               | C19H20N2O3    | 324.38 | USP-XXIII, INN, BAN    |
| OXYPHENCYCLIMINE HYDROCHLORIDE | 125-52-0, 125-53-1                | C20H29CIN2O3  | 380.92 | USP-XXII, INN, BAN,    |

Source:  
MicroSource Discovery Systems, Inc.

Kraft et al., TableS1  
NINDS Custom Collection II  
Compound Library

Yellow: Fascin-pathway enhancer  
Blue: Fascin-pathway blocker  
Green: Both

|                                |                                   |               |        |                    |
|--------------------------------|-----------------------------------|---------------|--------|--------------------|
| OXYQUINOLINE HEMISULFATE       | 148-24-3                          | C9H9NO5S      | 243.24 | USAN               |
| OXYTETRACYCLINE                | 6153-64-6, 79-57-2 [anhydrous]    | C22H25CIN2O9  | 496.91 | USP, INN, BAN, JAN |
| PACLITAXEL                     | 33069-62-4                        | C47H51NO14    | 853.93 | USP, INN, BAN      |
| PAEONOL                        | 552-41-0                          | C9H10O3       | 166.18 | experimental       |
| PALMATINE                      | 3486-67-7                         | C21H22NO5     | 368.41 | experimental       |
| PALMATINE CHLORIDE             | 10605-02-4                        | C21H22CINO4   | 387.87 | experimental       |
| PAPAVERINE HYDROCHLORIDE       | 61-25-6, 58-74-2 [papaverine]     | C20H22CINO4   | 375.86 | USP, BAN, JAN      |
| PARACHLOROPHENOL               | 106-48-9                          | C6H5ClO       | 128.56 | USP                |
| PARAROSANILINE PAMOATE         | 7232-51-1, 569-61-9               | C42H33N3O6    | 675.75 | USAN, INN          |
| PARAXANTHINE                   |                                   | C7H8N4O2      | 180.17 | experimental       |
| PAROMOMYCIN SULFATE            | 1263-89-4, 7542-37-2              | C23H47N5O18S  | 713.72 | USP, INN, BAN      |
| PATULIN                        | 149-29-1                          | C7H6O4        | 154.12 | experimental       |
| p-CHLOROPHENYLALANINE          | 7424-00-2(dl); 14173-39-8(l)      | C9H10CINO2    | 199.64 | experimental       |
| PEFLOXACINE MESYLATE           | 149676-40-4                       | C18H24FN3O6S  | 429.47 | USAN, INN, BAN     |
| PENICILLAMINE                  | 52-67-5                           | C5H11NO2S     | 149.21 | USP, INN, BAN, JAN |
| PENICILLIN V POTASSIUM         | 132-98-9, 87-08-1 [penicillin, V] | C16H17KN2O5S  | 388.49 | USP, JAN           |
| PENTAMIDINE ISETHIONATE        | 100-33-4                          | C23H36N4O10S2 | 592.69 | INN, BAN, JAN      |
| PENTETAZOL                     | 54-95-5                           | C6H10N4       | 138.17 | NF-XIII, INN, BAN  |
| PENTOLINIUM TARTRATE           | 52-62-0, 144-44-5 [pentolinium]   | C23H42N2O12   | 538.60 | NF-XIV, INN, BAN   |
| PENTOXIFYLLINE                 | 6493-05-6                         | C13H18N4O3    | 278.31 | USP, INN, BAN, JAN |
| PEONIFLORIN                    | 23180-57-6                        | C23H30O11     | 482.49 | experimental       |
| PERHEXILINE MALEATE            | 6724-53-4, 6621-47-2              | C23H39NO4     | 393.57 | USAN, INN, BAN     |
| PERICIAZINE                    | 2622-26-6                         | C21H23N3OS    | 365.50 | BAN, JAN           |
| PERILLIC ACID (-)              | 7694-45-3                         | C10H14O2      | 166.22 | experimental       |
| PERILLYL ALCOHOL               | 536-59-4, 18457-55-1              | C10H16O       | 152.24 | experimental       |
| PERINDOPRIL ERBUMINE           | 107133-36-8; 82834-16-0           | C23H43N3O5    | 441.62 | USAN               |
| PERPHENAZINE                   | 58-39-9                           | C21H26CIN3OS  | 403.98 | USP, INN, BAN, JAN |
| PERUVOSIDE                     | 1182-67-2                         | C30H44O9      | 548.68 | experimental       |
| PHENACETIN                     | 62-44-2                           | C10H13NO2     | 179.22 | USP-XX, INN, BAN   |
| PHENAZOPYRIDINE HYDROCHLORIDE  | 136-40-3, 94-78-0                 | C11H12CIN5    | 249.70 | USP, INN, BAN      |
| PHENELZINE SULFATE             | 156-51-4, 51-71-8 [phenelzine]    | C8H14N2O4S    | 234.28 | USP, INN, BAN      |
| PHENETHYL CAFFEATE (CAPE)      | 104594-70-9                       | C17H16O4      | 284.31 | experimental       |
| PHENINDIONE                    | 83-12-5                           | C15H10O2      | 222.25 | USP-XXII, INN, BAN |
| PHENIRAMINE MALEATE            | 132-20-7, 86-21-5                 | C20H24N2O4    | 356.43 | USP, INN, BAN      |
| PHENOTHRLIN                    | 26002-80-2                        | C23H26O3      | 350.46 | INN, BAN           |
| PHENOXYBENZAMINE HYDROCHLORIDE | 63-92-3, 59-96-1                  | C18H23Cl2NO   | 340.30 | USP                |
| PHENYLALANYLTYSOSINE           | 17355-18-9                        | C18H20N2O4    | 328.37 | experimental       |
| PHENYLBUTYRATE SODIUM          | 90-27-7 (phenylbutyric acid)      | C10H11NaO2    | 186.19 | experimental       |
| PHENYLEPHRINE HYDROCHLORIDE    | 61-76-7, 59-42-7                  | C9H14CINO2    | 203.67 | USP, INN, BAN, JAN |
| PHENYLMERCURIC ACETATE         | 62-38-4                           | C8H8HgO2      | 336.74 | NF                 |
| PHENYTOIN SODIUM               | 630-93-3, 57-41-0 [phenytoin]     | C15H11N2NaO2  | 274.26 | USP, JAN           |

Source:  
MicroSource Discovery Systems, Inc.

Kraft et al., TableS1  
NINDS Custom Collection II  
Compound Library

Yellow: Fascin-pathway enhancer  
Blue: Fascin-pathway blocker  
Green: Both

|                            |                                  |               |        |                       |
|----------------------------|----------------------------------|---------------|--------|-----------------------|
| PHLORIDZIN                 | 60-81-1                          | C21H24O10     | 436.42 | experimental          |
| PHYSCION                   | 521-61-9                         | C16H12O5      | 284.27 | experimental          |
| PHYSOSTIGMINE SALICYLATE   | 57-64-7, 57-47-6                 | C22H27N3O5    | 413.48 | USP, JAN              |
| PICROPODOPHYLLOTOXIN       | 477-47-4                         | C22H22O8      | 414.42 | experimental          |
| PICROTOXININ               | 17617-45-7                       | C15H16O6      | 292.29 | experimental          |
| PILOCARPINE NITRATE        | 148-72-1, 92-13-7 [pilocarpine]  | C11H17N3O5    | 271.28 | USP                   |
| PIMOZIDE                   | 2062-78-4                        | C28H29F2N3O   | 461.56 | USP, INN, BAN, JAN    |
| PIMPINELLIN                | 131-12-4                         | C13H10O5      | 246.22 | experimental          |
| PINACIDIL                  | 85371-64-8, 60560-33-0           | C13H19N5      | 245.33 | USAN, INN             |
| PINDOLOL                   | 13523-86-9                       | C14H20N2O2    | 248.33 | USP, INN, BAN, JAN    |
| PINOCEMBRIN                | 36052-37-6                       | C15H12O4      | 256.26 | experimental          |
| PIOGLITAZONE HYDROCHLORIDE | 111025-46-8 (pioglitazone)       | C19H21ClN2O3S | 392.91 | USAN, INN, BAN        |
| PIPERACILLIN SODIUM        | 59703-84-3, 66258-76-2           | C23H26N5NaO7S | 539.55 | USP, INN, BAN, JAN    |
| PIPERAZINE                 | 110-85-0, 144-29-6               | C4H10N2       | 86.14  | USP                   |
| PIPERIDOLATE HYDROCHLORIDE | 129-77-1, 82-98-4 [piperidolate] | C21H26ClNO2   | 359.90 | USP-XX, INN, BAN, JAN |
| PIPERINE                   | 94-62-2                          | C17H19NO3     | 285.35 | USP-VIII              |
| PIRACETAM                  | 7491-74-9                        | C6H10N2O2     | 142.16 | USAN, INN, BAN        |
| PIRENZEPINE HYDROCHLORIDE  | 29868-97-1, 28797-61-7           | C19H23Cl2N5O2 | 424.33 | USAN, INN, BAN, JAN   |
| PIROMIDIC ACID             | 19562-30-2                       | C14H16N4O3    | 288.31 | INN, JAN              |
| PIROXICAM                  | 36322-90-4                       | C15H13N3O4S   | 331.35 | USP, INN, BAN, JAN    |
| PODOFILOX                  | 518-28-5                         | C22H22O8      | 414.42 | USAN, BAN             |
| POMIFERIN                  | 572-03-2                         | C25H24O6      | 420.47 | experimental          |
| POTASSIUM p-AMINO BENZOATE | 150-13-0 (acid)                  | C7H6KNO2      | 175.23 | USP                   |
| PRALIDOXIME MESYLATE       | 154-97-2                         | C8H12N2O4S    | 232.26 | experimental          |
| PRAMOXINE HYDROCHLORIDE    | 637-58-1, 140-65-8 [pramoxine]   | C17H28ClNO3   | 329.87 | USAN, INN, BAN        |
| PRAVASTATIN SODIUM         | 81131-70-6                       | C23H35NaO7    | 446.52 | USAN, INN, BAN, JAN   |
| PRAZICQUANTEL              | 55268-74-1                       | C19H24N2O2    | 312.42 | USP, INN, BAN, JAN    |
| PREDNISOLONE               | 50-24-8 [anhydrous], 52438-85-   | C21H28O5      | 360.45 | USP, INN, BAN, JAN    |
| PREDNISOLONE ACETATE       | 52-21-1                          | C23H30O6      | 402.49 | USP, JAN              |
| PREDNISON                  | 53-03-2                          | C21H26O5      | 358.44 | USP, INN, BAN         |
| PREGABALIN                 | 148553-50-8                      | C8H17NO2      | 159.23 | USAN, INN             |
| PREGNENOLONE               | 145-13-1, 4598-67-8              | C21H32O2      | 316.49 | INN, BAN              |
| PRIDINOL METHANESULFONATE  | 511-45-5                         | C21H29NO4S    | 391.53 | INN, JAN              |
| PRILOCAINE HYDROCHLORIDE   | 1786-81-8, 721-50-6              | C13H21ClN2O   | 256.78 | USAN, INN, BAN        |
| PRIMAQUINE DIPHOSPHATE     | 63-45-6, 90-34-6 [primaquine]    | C15H27N3O9P2  | 455.34 | USP, INN, BAN         |
| PRIMIDONE                  | 125-33-7                         | C12H14N2O2    | 218.26 | USP, INN, BAN, JAN    |
| PRISTIMERIN                | 1258-84-0                        | C30H40O4      | 464.65 | experimental          |
| PROADIFEN HYDROCHLORIDE    | 78997-40-7                       | C23H32ClNO2   | 389.97 | USAN, INN             |
| PROBENECID                 | 57-66-9                          | C13H19NO4S    | 285.36 | USP, INN, BAN, JAN    |
| PROBUCOL                   | 23288-49-5                       | C31H48O2S2    | 516.86 | USP, INN, BAN, JAN    |
| PROCAINAMIDE HYDROCHLORIDE | 614-39-1, 51-06-9                | C13H22ClN3O   | 271.79 | USP, INN, BAN, JAN    |

Source:  
MicroSource Discovery Systems, Inc.

Kraft et al., TableS1  
NINDS Custom Collection II  
Compound Library

Yellow: Fascin-pathway enhancer  
Blue: Fascin-pathway blocker  
Green: Both

|                                 |                               |                |        |                     |
|---------------------------------|-------------------------------|----------------|--------|---------------------|
| PROCHLORPERAZINE EDISYLATE      | 1257-78-9, 84-02-6            | C22H30CIN3O6S3 | 564.15 | USP, JAN            |
| PROCYCLIDINE HYDROCHLORIDE      | 1508-76-5, 77-37-2            | C19H30CINO     | 323.91 | USP, INN, BAN       |
| PROGESTERONE                    | 57-83-0                       | C21H30O2       | 314.47 | USP, INN, BAN, JAN  |
| PROGLUMIDE                      | 6620-60-6                     | C18H26N2O4     | 334.42 | USAN, INN, BAN, JAN |
| PROMAZINE HYDROCHLORIDE         | 53-60-1, 58-40-2 [promazine]  | C17H21CIN2S    | 320.89 | USP, INN, BAN       |
| PROMETHAZINE HYDROCHLORIDE      | 58-33-3, 60-87-7              | C17H21CIN2S    | 320.89 | USP, INN, BAN, JAN  |
| PRONETALOL HYDROCHLORIDE        | 54-80-8                       | C15H20CINO     | 265.79 | INN, BAN            |
| PROPAFENONE HYDROCHLORIDE       | 34183-22-7, 54063-53-5        | C21H28CINO3    | 377.92 | USP, INN, BAN, JAN  |
| PROPANTHELINE BROMIDE           | 50-34-0, 298-50-0             | C23H30BrNO3    | 448.40 | USP, INN, BAN, JAN  |
| PROPRANOLOL HYDROCHLORIDE (+/-) | 318-98-9, 525-66-6            | C16H22CINO2    | 295.81 | USP, INN, BAN, JAN  |
| PROPYLTHIOURACIL                | 51-52-5                       | C7H10N2OS      | 170.23 | USP, INN, BAN, JAN  |
| PROTHIONAMIDE                   | 14222-60-7                    | C9H12N2S       | 180.27 | INN, BAN, JAN       |
| PROTOPORPHYRIN IX               | 553-12-8                      | C34H34N4O4     | 562.67 | JAN                 |
| PROTOVERATRINE B                | 124-97-0                      | C41H63NO15     | 809.96 | INN                 |
| PSEUDOEPHEDRINE HYDROCHLORIDE   | 345-78-8, 90-82-4             | C10H16CINO     | 201.70 | USP, INN, BAN       |
| PUROMYCIN HYDROCHLORIDE         | 58-58-2, 53-79-2 [puromycin]  | C22H31Cl2N7O5  | 544.44 | USAN, INN, BAN      |
| PURPURIN                        | 81-54-9                       | C14H8O5        | 256.22 | experimental        |
| PYRANTEL PAMOATE                | 22204-24-6, 15686-83-6        | C34H30N2O6S    | 594.69 | USP, INN, BAN, JAN  |
| PYRAZINAMIDE                    | 98-96-4                       | C5H5N3O        | 123.12 | USP, INN, BAN, JAN  |
| PYRIDOSTIGMINE BROMIDE          | 101-26-8, 155-97-5            | C9H13BrN2O2    | 261.12 | USP, INN, BAN, JAN  |
| PYRILAMINE MALEATE              | 59-33-6, 91-84-9 [pyrilamine] | C21H27N3O5     | 401.47 | USP, INN, BAN       |
| PYRIMETHAMINE                   | 58-14-0                       | C12H13CIN4     | 248.72 | USP, INN, BAN, JAN  |
| PYRITHIONE ZINC                 | 13463-41-7                    | C10H10N2O2S2Zn | 319.70 | USAN, INN, BAN      |
| PYRITHYLDIONE                   | 77-04-3                       | C9H13NO2       | 167.21 | INN                 |
| PYRVINIUM PAMOATE               | 3546-41-6                     | C49H43N3O6     | 769.91 | USP, BAN, JAN       |
| QUASSIN                         | 76-78-8                       | C22H28O6       | 388.46 | experimental        |
| QUERCETIN                       | 117-39-5                      | C15H10O7       | 302.24 | experimental        |
| QUERCITRIN                      | 522-12-3                      | C21H20O11      | 448.39 | experimental        |
| QUINACRINE HYDROCHLORIDE        | 6151-30-0, 69-05-6            | C23H32Cl3N3O   | 472.89 | USP-XXII, INN, BAN  |
| QUINALIZARIN                    | 81-61-8                       | C14H8O6        | 272.22 | experimental        |
| QUINAPRIL HYDROCHLORIDE         | 82586-55-8, 85441-61-8        | C25H31CIN2O5   | 474.99 | USP, INN, BAN       |
| QUINIDINE GLUCONATE             | 7054-25-3, 6591-63-5          | C26H36N2O9     | 520.58 | USP                 |
| QUININE SULFATE                 | 6119-70-6, 804-63-7           | C20H26N2O6S    | 422.50 | USP, JAN            |
| QUINOLINIC ACID                 |                               | C7H5NO4        | 167.12 | experimental        |
| RACEPHEDRINE HYDROCHLORIDE      | 134-71-4, 90-81-3             | C10H16CINO     | 201.70 | USAN, INN, BAN      |
| RAMIFENAZONE                    | 3615-24-5                     | C14H20CIN3O    | 281.79 | INN                 |
| RANITIDINE                      | 66357-35-5                    | C13H22N4O3S    | 314.41 | USAN, INN, BAN      |
| RAUWOLSCINE HYDROCHLORIDE       |                               | C21H27CIN2O3   | 390.91 | experimental        |
| RESORCINOL                      | 108-46-3                      | C6H6O2         | 110.11 | USP, JAN            |
| RESORCINOL MONOACETATE          | 102-29-4                      | C8H8O3         | 152.15 | USP                 |
| RESVERATROL                     | 501-36-0                      | C14H12O3       | 228.25 | experimental        |



Source:  
MicroSource Discovery Systems, Inc.

Kraft et al., TableS1  
NINDS Custom Collection II  
Compound Library

Yellow: Fascin-pathway enhancer  
Blue: Fascin-pathway blocker  
Green: Both

|                                   |                              |                |        |                    |
|-----------------------------------|------------------------------|----------------|--------|--------------------|
| RETINOL                           | 68-26-8                      | C20H30O        | 286.46 | INN, BAN           |
| RETINYL ACETATE                   | 127-47-9                     | C22H32O2       | 328.50 | JAN                |
| RETINYL PALMITATE                 | 79-81-2                      | C36H60O2       | 524.88 | JAN                |
| RHAPONTIN                         | 155-58-8                     | C21H24O9       | 420.42 | experimental       |
| RIBOFLAVIN                        | 83-88-5                      | C17H20N4O6     | 376.37 | USP, INN, BAN, JAN |
| RIFAMPIN                          | 13292-46-1                   | C43H58N4O12    | 822.96 | USP, INN, BAN, JAN |
| RIFAXIMIN                         | 80621-81-4                   | C43H51N3O11    | 785.90 | USAN, INN          |
| RILUZOLE                          | 1744-22-5                    | C8H5F3N2OS     | 234.20 | USAN, INN, BAN     |
| RITODRINE HYDROCHLORIDE           | 23239-51-2, 26652-09-5       | C17H22ClNO3    | 323.82 | USAN, INN, BAN     |
| ROFECOXIB                         | 162011-90-7                  | C17H14O4S      | 314.36 | INN, BAN           |
| RONIDAZOLE                        | 7681-76-7                    | C6H8N4O4       | 200.16 | USAN, INN, BAN     |
| ROSIGLITAZONE                     | 122320-73-4                  | C18H19N3O3S    | 357.43 | USAN, INN, BAN     |
| ROSMARINIC ACID                   | 537-15-5                     | C18H16O8       | 360.32 | experimental       |
| ROSOLIC ACID                      | 603-45-2                     | C19H14O3       | 290.32 | experimental       |
| ROSUVASTATIN                      | 287714-14-4, 147098-20-2(Ca) | C22H28FN3O6S   | 481.55 | USAN, INN, BAN     |
| ROTENONE                          | 83-79-4                      | C23H22O6       | 394.43 | agricultural use   |
| ROXARSONE                         | 121-19-7                     | C6H6AsNO6      | 263.04 | USP, INN, BAN      |
| ROXITHROMYCIN                     | 80214-83-1                   | C41H76N2O15    | 837.07 | USAN, INN, JAN     |
| RUTILANTINONE                     | 21288-61-9                   | C22H20O9       | 428.40 | experimental       |
| S-(1,2-DICARBOXYETHYL)GLUTATHIONE | 1115-52-2                    | C15H23N3O10S   | 437.43 | experimental       |
| SACCHARIN                         | 81-07-2                      | C7H5NO3S       | 183.19 | NF                 |
| SAFROLE                           | 94-59-7                      | C10H10O2       | 162.19 | experimental       |
| SALICIN                           | 138-52-3                     | C13H18O7       | 286.28 | USP-IX             |
| SALICYL ALCOHOL                   | 90-01-7                      | C7H8O2         | 124.14 | USAN               |
| SALICYLAMIDE                      | 65-45-2                      | C7H7NO2        | 137.14 | USP, INN, BAN, JAN |
| SALINOMYCIN, SODIUM               | 53003-10-4                   | C42H69NaO11    | 773.00 | INN, BAN           |
| SALSOLINE                         | 89-31-6                      | C11H15NO2      | 193.25 | experimental       |
| SARAFLOXACIN HYDROCHLORIDE        | 91296-87-6                   | C20H18ClF2N3O3 | 421.83 | USAN, INN, BAN     |
| SCOPOLAMINE HYDROBROMIDE          | 6533-68-2, 114-49-8          | C17H22BrNO4    | 384.27 | USP, BAN, JAN      |
| SECNIDAZOLE                       | 3366-95-8                    | C7H11N3O3      | 185.18 | INN, BAN           |
| SECURININE                        | 5610-40-2                    | C13H15NO2      | 217.27 | INN                |
| SELAMECTIN                        | 165108-07-6                  | C43H63NO11     | 769.98 | USAN, INN          |
| SEMUSTINE                         | 13909-09-6                   | C10H18ClN3O2   | 247.73 | USAN, INN          |
| SENNOSIDE A                       | 81-27-6                      | C42H38O20      | 862.76 | USP, JAN           |
| SERTRALINE HYDROCHLORIDE          | 79559-97-0; 79617-96-2(base) | C17H18Cl3N     | 342.70 | USAN, INN, BAN     |
| SIBUTRAMINE HYDROCHLORIDE         | 84485-00-7; 106650-56-0      | C17H27Cl2N     | 316.32 | USAN, INN, BAN     |
| SILDENAFIL                        | 139755-83-2                  | C22H30N6O4S    | 474.59 | USAN, INN, BAN     |
| SILIBININ                         | 22888-70-6                   | C25H22O10      | 482.45 | INN                |
| SINOMENINE                        | 115-53-7                     | C19H23NO4      | 329.40 | experimental       |
| SISOMICIN SULFATE                 | 53179-09-2, 32385-11-8       | C19H39N5O11S   | 545.61 | USP, BAN, JAN      |
| S-METHYL-L-THIOCITRULLINE ACETATE | 156719-41-4                  | C7H15N3O2S     | 205.28 | experimental       |

Source:  
MicroSource Discovery Systems, Inc.

Kraft et al., TableS1  
NINDS Custom Collection II  
Compound Library

Yellow: Fascin-pathway enhancer  
Blue: Fascin-pathway blocker  
Green: Both

|                                                         |                        |                 |        |                     |
|---------------------------------------------------------|------------------------|-----------------|--------|---------------------|
| SNAP (S-NITROSO-N-ACETYL PENICILLAMINE)                 | 79032-48-7             | C7H12N2O4S      | 220.25 | experimental        |
| SODIUM beta-NICOTINAMIDE ADENINE DINUCLEOTIDE PHOSPHATE |                        | C21H27N7NaO17P3 | 765.40 | experimental        |
| SODIUM DEHYDROCHOLATE                                   | 145-41-5               | C24H33NaO5      | 424.52 | USP, INN, BAN, JAN  |
| SPAGLUMIC ACID                                          | 4910-46-7              | C11H16N2O8      | 304.26 | INN                 |
| SPARTEINE HYDROIODIDE                                   |                        | C15H27IN2       | 362.30 | experimental        |
| SPARTEINE SULFATE                                       | 6160-12-9, 299-39-8    | C15H28N2O4S     | 332.47 | USAN, BIN, JAN      |
| SPECTINOMYCIN HYDROCHLORIDE                             | 22189-32-8, 21736-83-4 | C14H26Cl2N2O7   | 405.28 | USP, INN, BAN, JAN  |
| SPERMIDINE TRIHYDROCHLORIDE                             |                        | C7H22Cl3N3      | 254.63 | experimental        |
| SPIPERONE                                               | 749-02-0               | C23H26FN3O2     | 395.48 | USAN, INN, BAN, JAN |
| SPIRAMYCIN                                              | 8025-81-8              | C43H74N2O14     | 843.07 | USAN, INN, BAN      |
| SPIRONOLACTONE                                          | 52-01-7                | C24H32O4S       | 416.58 | USP, INN, BAN, JAN  |
| STREPTOMYCIN SULFATE                                    | 3810-74-0, 57-92-1     | C21H41N7O16S    | 679.66 | USP, INN, BAN, JAN  |
| STREPTOZOSIN                                            | 18883-66-4             | C8H15N3O7       | 265.22 | USAN, INN           |
| STRYCHNINE                                              | 57-24-9                | C21H22N2O2      | 334.42 | NF-X                |
| SULCONAZOLE NITRATE                                     | 61318-91-0, 61318-90-9 | C18H16Cl3N3O3S  | 460.77 | USP, INN, BAN, JAN  |
| SULFABENZAMIDE                                          | 127-71-9               | C13H12N2O3S     | 276.32 | USP, INN, BAN       |
| SULFACETAMIDE                                           | 144-80-9, 127-56-0     | C8H10N2O3S      | 214.24 | USP, INN, BAN       |
| SULFACHLORPYRIDAZINE                                    | 80-32-0                | C10H9ClN4O2S    | 284.73 | USP, INN, BAN       |
| SULFADIAZINE                                            | 68-35-9                | C10H10N4O2S     | 250.28 | USP, INN, BAN, JAN  |
| SULFADIMETHOXINE                                        | 122-11-2               | C12H14N4O4S     | 310.33 | USP, INN, BAN, JAN  |
| SULFAGUANIDINE                                          | 57-67-0                | C7H10N4O2S      | 214.25 | NF-XI, INN, BAN     |
| SULFAMERAZINE                                           | 127-79-7               | C11H12N4O2S     | 264.31 | USP-XXIII, INN, BAN |
| SULFAMETER                                              | 651-06-9               | C11H12N4O3S     | 280.31 | USAN, INN, BAN      |
| SULFAMETHAZINE                                          | 57-68-1                | C12H14N4O2S     | 278.33 | USP, INN, BAN       |
| SULFAMETHIZOLE                                          | 144-82-1               | C9H10N4O2S2     | 270.33 | USP, INN, BAN, JAN  |
| SULFAMETHOXAZOLE                                        | 723-46-6               | C10H11N3O3S     | 253.28 | USP, INN, BAN, JAN  |
| SULFAMETHOXYPYRIDAZINE                                  | 80-35-3                | C11H12N4O3S     | 280.31 | USP-XVII, INN, BAN  |
| SULFANILAMIDE                                           | 63-74-1                | C6H8N2O2S       | 172.21 | NF-XI, INN          |
| SULFAPHENAZOLE                                          | 526-08-9               | C15H14N4O2S     | 314.37 | INN, BAN, JAN       |
| SULFAPYRIDINE                                           | 144-83-2               | C11H11N3O2S     | 249.29 | USP, INN, BAN       |
| SULFASALAZINE                                           | 599-79-1               | C18H14N4O5S     | 398.40 | USP, INN, BAN       |
| SULFATHIAZOLE                                           | 72-14-0                | C9H9N3O2S2      | 255.32 | USP, INN, BAN       |
| SULFINPYRAZONE                                          | 57-96-5                | C23H20N2O3S     | 404.49 | USP, INN, BAN, JAN  |
| SULFISOXAZOLE                                           | 127-69-5               | C11H13N3O3S     | 267.31 | USP, INN, BAN, JAN  |
| SULINDAC                                                | 38194-50-2             | C20H17FO3S      | 356.42 | USP, INN, BAN, JAN  |
| SULOCTIDIL                                              | 54063-56-8             | C20H35NOS       | 337.57 | USAN, INN, BAN      |
| SULPIRIDE                                               | 15676-16-1             | C15H23N3O4S     | 341.43 | USAN, INN, BAN, JAN |
| SUPROFEN                                                | 40828-46-4             | C14H12O3S       | 260.31 | USP, INN, BAN, JAN  |
| SUPROFEN METHYL ESTER                                   |                        | C15H14O3S       | 274.34 | experimental        |
| SUXIBUZONE                                              | 27470-51-5             | C24H26N2O6      | 438.48 | INN, BAN, JAN       |
| TAMOXIFEN CITRATE                                       | 54965-24-1, 10540-29-1 | C32H37NO8       | 563.65 | USP, INN, BAN, JAN  |

Source:  
MicroSource Discovery Systems, Inc.

Kraft et al., TableS1  
NINDS Custom Collection II  
Compound Library

Yellow: Fascin-pathway enhancer  
Blue: Fascin-pathway blocker  
Green: Both

|                                |                                  |                |         |                     |
|--------------------------------|----------------------------------|----------------|---------|---------------------|
| TANNIC ACID                    | 1401-55-4                        | C76H52O46      | 1701.23 | USP, JAN            |
| TARGININE HYDROCHLORIDE        | 156706-47-7, 17035-90-           | C7H17CIN4O2    | 224.69  | INN, BAN            |
| TEGASEROD MALEATE              | 189188-57-6                      | C20H27N5O5     | 417.47  | USAN                |
| TELENZEPINE HYDROCHLORIDE      | 80880-90-6                       | C19H23CIN4O2S  | 406.94  | INN                 |
| TELITHROMYCIN                  | 191114-48-4                      | C44H65N5O10    | 824.04  | USAN, INN, BAN      |
| TENIPOSIDE                     | 29767-20-2                       | C32H32O13S     | 656.67  | USAN, INN, BAN      |
| TENOXICAM                      | 59804-37-4                       | C13H11N3O4S2   | 337.38  | USAN, INN, BAN, JAN |
| TERBUTALINE HEMISULFATE        | 23031-32-5, 23031-25-6           | C12H21NO7S     | 323.37  | USP, INN, BAN, JAN  |
| TETRACAINE HYDROCHLORIDE       | 136-47-0, 94-24-6 [tetracaine]   | C15H25CIN2O2   | 300.83  | USP, BAN, JAN       |
| TETRACHLOROISOPHTHALONITRILE   |                                  | C8Cl4N2        | 265.91  | experimental        |
| TETRACYCLINE HYDROCHLORIDE     | 64-75-5, 60-54-8 [tetracycline]  | C22H25CIN2O8   | 480.91  | USP, INN, BAN, JAN  |
| TETRAHYDROPALMATINE            | 3520-14-7                        | C21H25NO4      | 355.44  | experimental        |
| TETRAHYDROZOLINE HYDROCHLORIDE | 522-48-5, 84-22-0                | C13H17CIN2     | 236.75  | USP, INN, BAN, JAN  |
| TETRANDRINE                    | 518-34-3                         | C38H42N2O6     | 622.77  | experimental        |
| Tfa-VAL-TYR-VAL-OH             | 64577-63-5                       | C21H28F3N3O6   | 475.47  | experimental        |
| THEOBROMINE                    | 83-67-0                          | C7H8N4O2       | 180.17  | NF-XII, BAN         |
| THEOPHYLLINE                   | 5967-84-0, 58-55-9 [anhydrous]   | C7H8N4O2       | 180.17  | USP, BAN, JAN       |
| THIABENDAZOLE                  | 148-79-8                         | C10H7N3S       | 201.25  | USP, INN, BAN, JAN  |
| THIAMPHENICOL                  | 15318-45-3                       | C12H15CIN2NO5S | 356.23  | USAN, INN, BAN, JAN |
| THIMEROSAL                     | 54-64-8                          | C9H9HgNaO2S    | 404.81  | USP, INN, BAN, JAN  |
| THIOCTIC ACID                  | 62-46-4                          | C8H14O2S2      | 206.33  | JAN                 |
| THIOGUANINE                    | 154-42-7, 5580-03-0              | C5H5N5S        | 167.19  | USP, INN, BAN       |
| THIORIDAZINE HYDROCHLORIDE     | 130-61-0, 50-52-2 [thioridazine] | C21H27CIN2S2   | 407.04  | USP, INN, BAN       |
| THIOTEPA                       | 52-24-4                          | C6H12N3PS      | 189.22  | USP, INN, BAN, JAN  |
| THIOTHIXENE                    | 5591-45-7, 3313-26-6 [//Z//]     | C23H29N3O2S2   | 443.63  | USP, INN, BAN, JAN  |
| THYROXINE                      | 51-48-9                          | C15H11I4NO4    | 776.88  | BAN                 |
| TIAPRIDE HYDROCHLORIDE         | 51012-32-9                       | C15H25CIN2O4S  | 364.89  | USAN, INN, BAN      |
| TIMOLOL MALEATE                | 26921-17-5, 91524-16-2           | C17H28N4O7S    | 432.50  | USP, JAN            |
| TINIDAZOLE                     | 19387-91-8                       | C8H13N3O4S     | 247.27  | USP, INN, BAN, JAN  |
| TIOXOLONE                      | 4991-65-5                        | C7H4O3S        | 168.17  | INN, BAN            |
| TODRALAZINE HYDROCHLORIDE      | 14679-73-3                       | C11H13CIN4O2   | 268.70  | INN, BAN, JAN       |
| TOLAZAMIDE                     | 1156-19-0                        | C14H21N3O3S    | 311.41  | USP, INN, BAN, JAN  |
| TOLAZOLINE HYDROCHLORIDE       | 59-97-2, 59-98-3 [tolazoline]    | C10H13CIN2     | 196.68  | USP, INN, BAN, JAN  |
| TOLBUTAMIDE                    | 64-77-7                          | C12H18N2O3S    | 270.35  | USP, INN, BAN, JAN  |
| TOLFENAMIC ACID                | 13710-19-5                       | C14H12CINO2    | 261.71  | INN, BAN, JAN       |
| TOLMETIN SODIUM                | 64490-92-2, 26171-23-3           | C15H14NNaO3    | 279.27  | USP, JAN            |
| TOLNAFTATE                     | 2398-96-1                        | C19H17NOS      | 307.42  | USP, INN, BAN, JAN  |
| TOMATINE                       | 86273-92-9                       | C47H79NO21     | 994.15  | experimental        |
| TOPIRAMATE                     | 97240-79-4                       | C12H21NO8S     | 339.37  | USAN, INN, BAN      |
| TORSEMIDE                      | 56211-40-6                       | C16H20N4O3S    | 348.43  | USP, INN, BAN       |
| TRANDOLAPRIL                   | 87679-37-6                       | C24H34N2O5     | 430.55  | INN, BAN            |

Source:  
MicroSource Discovery Systems, Inc.

Kraft et al., TableS1  
NINDS Custom Collection II  
Compound Library

Yellow: Fascin-pathway enhancer  
Blue: Fascin-pathway blocker  
Green: Both

|                                       |                              |                |         |                     |
|---------------------------------------|------------------------------|----------------|---------|---------------------|
| TRANEXAMIC ACID                       | 1197-18-8                    | C8H15NO2       | 157.21  | USAN, INN, BAN, JAN |
| TRANILAST                             | 53902-12-8                   | C18H17NO5      | 327.34  | USAN, INN, JAN      |
| TRANLYCYPROMINE SULFATE               | 13492-01-8, 7081-36-9        | C9H13NO4S      | 231.27  | USP-XXI, INN, BAN   |
| TRAZODONE HYDROCHLORIDE               | 25332-39-2, 19794-93-5       | C19H23Cl2N5O   | 408.33  | USP, INN, BAN, JAN  |
| TRETINON                              | 302-79-4                     | C20H28O2       | 300.44  | USP, INN, BAN       |
| TRIACETIN                             | 102-76-1                     | C9H14O6        | 218.21  | USP, INN, BAN       |
| TRIADIMEFON                           | 43121-43-3                   | C14H16ClN3O2   | 293.76  | agricultural use    |
| TRIAMCINOLONE                         | 124-94-7                     | C21H27FO6      | 394.44  | USP, INN, BAN, JAN  |
| TRIAMCINOLONE ACETONIDE               | 76-25-5                      | C24H31FO6      | 434.51  | USP, INN, BAN, JAN  |
| TRIAMCINOLONE DIACETATE               | 67-78-7                      | C25H31FO8      | 478.52  | USP, JAN            |
| TRIAMTERENE                           | 396-01-0                     | C12H11N7       | 253.27  | USP, INN, BAN, JAN  |
| TRICHLORMETHIAZIDE                    | 133-67-5                     | C8H8Cl3N3O4S2  | 380.66  | USP, INN, JAN       |
| TRIFLUOPERAZINE HYDROCHLORIDE         | 440-17-5, 117-89-5           | C21H26Cl2F3N3S | 480.43  | USP, INN, BAN, JAN  |
| TRIHENXYPHENIDYL HYDROCHLORIDE        | 52-49-3                      | C20H32ClNO     | 337.94  | USP, INN, BAN, JAN  |
| TRIMEDLURE                            | 12002-53-8                   | C12H21ClO2     | 232.75  | agricultural use    |
| TRIMEPRAZINE TARTRATE                 | 4330-99-8, 41375-66-0        | C22H28N2O6S    | 448.54  | USP, INN, BAN, JAN  |
| TRIMETHOBENZAMIDE HYDROCHLORIDE       | 554-92-7, 138-56-7           | C21H29ClN2O5   | 424.93  | USP, INN            |
| TRIMETHOPRIM                          | 738-70-5                     | C14H18N4O3     | 290.32  | USP, INN, BAN, JAN  |
| TRIMIPRAMINE MALEATE                  | 521-78-8, 739-71-9           | C24H30N2O4     | 410.52  | USAN, JAN           |
| TRIOXSALEN                            | 3902-71-4                    | C14H12O3       | 228.25  | USP, INN, JAN       |
| TRIPROLIDINE HYDROCHLORIDE            | 6138-79-0, 550-70-9          | C19H23ClN2     | 314.86  | USP, INN, BAN, JAN  |
| TRISODIUM ETHYLENEDIAMINE TETRACETATE | 150-38-9                     | C10H16N2Na3O8  | 361.22  | USAN                |
| TROLEANDMYCIN                         | 2751-09-9                    | C41H67NO15     | 813.99  | USP, INN, BAN, JAN  |
| TROPICAMIDE                           | 1508-75-4                    | C17H20N2O2     | 284.36  | USP, INN, BAN, JAN  |
| TROXERUTIN                            | 7085-55-4                    | C33H42O19      | 742.69  | INN, BAN            |
| TRYPTAMINE                            | 61-54-1                      | C10H12N2       | 160.22  | experimental        |
| TRYPTOPHAN                            | 73-22-3 [L]                  | C11H12N2O2     | 204.23  | USP, INN, JAN       |
| TUAMINOHEPTANE SULFATE                | 6411-75-2, 123-82-0          | C7H19NO4S      | 213.30  | USP-XX              |
| TULOBUTEROL                           | 41570-61-0                   | C12H19Cl2NO    | 264.20  | INN, BAN, JAN       |
| TYLOSIN TARTRATE                      | 1405-54-5, 1401-69-0(base)   | C46H77NO17     | 916.12  | USP, INN, BAN       |
| TYROTHRIN                             | 1404-88-2                    | C66H85N11O15   | 1272.48 | USP, INN, BAN       |
| URETHANE                              | 51-79-6                      | C3H7NO2        | 89.09   | INN                 |
| URSODIOL                              | 128-13-2                     | C24H40O4       | 392.58  | USP, INN, BAN, JAN  |
| USNIC ACID                            | 125-46-2                     | C18H16O7       | 344.32  | experimental        |
| VALDECOXIB                            | 181695-72-7                  | C16H14N2O3S    | 314.37  | USAN, INN, BAN      |
| VALERYL SALICYLATE                    | 64206-54-8                   | C12H14O4       | 222.24  | experimental        |
| VALPROATE SODIUM                      | 1069-66-5, 99-66-1 [valproic | C8H15NaO2      | 166.20  | USAN, JAN           |
| VALSARTAN                             | 137862-53-4                  | C24H29N5O3     | 435.53  | USAN, INN, BAN      |
| VALYLTRYPTOPHAN                       | 24587-37-9                   | C16H21N3O3     | 303.36  | experimental        |
| VANCOMYCIN HYDROCHLORIDE              | 1404-93-9, 1404-90-6         | C67H77Cl3N8O24 | 1484.76 | USP, INN, BAN, JAN  |
| VENLAFAXINE                           | 99300-78-4, 93413-69-5       | C17H27NO2      | 277.41  | USAN, INN, BAN      |

Source:  
MicroSource Discovery Systems, Inc.

Kraft et al., TableS1  
NINDS Custom Collection II  
Compound Library

Yellow: Fascin-pathway enhancer  
Blue: Fascin-pathway blocker  
Green: Both

|                              |                               |              |        |                    |
|------------------------------|-------------------------------|--------------|--------|--------------------|
| VERAPAMIL HYDROCHLORIDE      | 152-11-4, 52-53-9 [verapamil] | C27H39CIN2O4 | 491.08 | USP, INN, BAN, JAN |
| VERATRIDINE                  | 71-62-5                       | C37H53NO12   | 703.83 | experimental       |
| VERATRINE SULFATE            | 62-59-9                       | C32H51NO13S  | 689.83 | experimental       |
| VESAMICOL HYDROCHLORIDE      | 120447-62-3                   | C17H26CINO   | 295.86 | USAN               |
| VIDARABINE                   | 24356-66-9, 5536-17-4         | C10H13N5O4   | 267.25 | USP, INN, BAN, JAN |
| VINBURNINE                   | 4880-88-0                     | C19H22N2O    | 294.40 | INN                |
| VINCAMINE                    | 1617-90-9                     | C21H26N2O3   | 354.45 | INN, BAN           |
| VINPOCETINE                  | 42971-09-5                    | C22H26N2O2   | 350.46 | USAN, INN, JAN     |
| VULPINIC ACID                | 521-52-8                      | C19H14O5     | 322.32 | experimental       |
| XANTHURENIC ACID             | 59-00-7                       | C10H7NO4     | 205.17 | experimental       |
| XYLAZINE                     | 23076-35-9, 7361-61-7         | C12H16N2S    | 220.34 | USP, INN, BAN      |
| XYLOMETAZOLINE HYDROCHLORIDE | 1218-35-5, 526-36-3           | C16H25CIN2   | 280.84 | USP, INN, BAN      |
| YOHIMBINE HYDROCHLORIDE      | 65-19-0                       | C21H27CIN2O3 | 390.91 | USP                |
| ZAPRINAST                    | 37762-06-4                    | C13H13N5O2   | 271.28 | INN, BAN           |
| ZIDOVUDINE [AZT]             | 30516-87-1                    | C10H13N5O4   | 267.25 | USP, INN, BAN, JAN |
| ZOLMITRIPTAN                 | 139264-17-8                   | C16H21N3O2   | 287.36 | USAN, INN, BAN     |
| ZOMEPIRAC SODIUM             | 64092-49-5, 64092-48-4        | C15H14CINO3  | 291.74 | USAN, INN, BAN     |
| ZOXAZOLAMINE                 | 61-80-3                       | C7H5CIN2O    | 168.58 | NF-XI, INN, BAN    |

**Table S2. Fascin-pathway enhancers (filagree decrease) identified in the fascin bioassay.**

Each section is arranged in alphabetical order by compound name. Additional abbreviations at bottom of last page.

<sup>1</sup> A: agricultural/aquacultural use; H: human medical use; I: industrial use; V: veterinary medical use;

T: traditional/folk medicine use; [possible uses, shown in brackets, are based on available data].

<sup>2</sup> Cytotoxicity: apparent cell death or degeneration.

| Activity Class<br>Compound Name                                                                     | CAS #       | Chemical Class                                                   | Pharmacological Effects                                                                                 | Therapeutic and other<br>Uses <sup>1</sup>                                             | Therapeutic Class<br>(see Fig. 3D) |
|-----------------------------------------------------------------------------------------------------|-------------|------------------------------------------------------------------|---------------------------------------------------------------------------------------------------------|----------------------------------------------------------------------------------------|------------------------------------|
| <b>High-Potency Fascin-Pathway Enhancers<br/>with no cytotoxicity or morphological effects (10)</b> |             |                                                                  |                                                                                                         |                                                                                        |                                    |
| 5-Nitro-2-(3-phenylpropylamino) benzoic Acid (NPPB)                                                 | 107254-86-4 | Nitrobenzoate                                                    | Blocks volume-regulated chloride channels; inhibitor of angiogenesis                                    | [H: cancer, various]                                                                   | Cancer                             |
| Carbenoxolone Sodium (CBX)                                                                          | 7421-40-1   | Pentacyclic triterpene                                           | Blocks gap junctions & hemichannels; prostaglandin modulator                                            | [H: GI ulcers]                                                                         | Ulcers                             |
| Cyclocreatine                                                                                       | 35404-50-3  | Imidazole                                                        | Anti-proliferation                                                                                      | None                                                                                   | None known                         |
| Cyproterone                                                                                         | 2098-66-0   | Steroid; pregnadiene                                             | Androgen antagonist                                                                                     | [H: prostate cancer]                                                                   | Cancer                             |
| Dyphylline                                                                                          | 479-18-5    | Xanthine                                                         | Bronchodilator                                                                                          | H: asthma, emphysema                                                                   | Pulmonary                          |
| Estradiol Propionate                                                                                | 3758-34-7   | Steroid, estrogen                                                | Reproductive steroid; Estrogen receptor agonist                                                         | [H: other estrogens used for HRT & OC]                                                 | Endocrine                          |
| Mephenesin                                                                                          | 59-47-2     | Propylene glycol                                                 | Muscle relaxation, central-acting                                                                       | [H: Spasticity]                                                                        | CNS                                |
| Palmatine Chloride                                                                                  | 10605-02-4  | Isoquinoline alkaloid, a/k/a berberine alkaloid                  | Antibacterial; anti-tumor activity                                                                      | T: diverse uses as plant extract                                                       | Antibacterial, Cancer              |
| Sulfamethazine                                                                                      | 57-68-1     | Sulfonamide (sulfanilamide)                                      | Antibacterial                                                                                           | V: bacterial infections                                                                | Antibacterial                      |
| Sulfasalazine                                                                                       | 599-79-1    | Sulfonamide, sulfapyridine + 5-amino salicylic acid, azo linkage | NSAID; metabolized to active 5-aminosalicylic acid                                                      | H: ulcerative colitis; rheumatoid arthritis                                            | Anti-inflammatory                  |
| <b>High-Potency Fascin-Pathway Enhancers<br/>with cytotoxicity<sup>2</sup> at high dose (9)</b>     |             |                                                                  |                                                                                                         |                                                                                        |                                    |
| Chloroacetoxyquinoline                                                                              | N/A         | Chloroquinoline                                                  | unknown                                                                                                 | None.                                                                                  | None known                         |
| Deguelin (cis isomer)                                                                               | 522-17-8    | Isoflavonoid                                                     | anti-angiogenesis; cancer apoptosis; AKT inhibitor                                                      | [H: cancer prevention or Rx]                                                           | Cancer                             |
| Gedunin                                                                                             | 2753-30-2   | Triterpene                                                       | blocks cancer proliferation, gastric acid secretion                                                     | [H: malaria, cancer, peptic ulcer]                                                     | Antiparasitic, Cancer, Ulcers      |
| Juglone                                                                                             | 481-39-0    | Naphthalene                                                      | Inhibits Pin1 isomerase, which regulates neuronal cytoskeleton phosphorylation & promotes tumor growth; | A: food preservative.<br>T: anti-fungal;<br>[H: neurodegenerative dz; cancer, various] | Antimicrobial, Cancer, CNS         |

**Table S2. Fascin-pathway enhancers, cont.** (Kraft et al., A cell-based fascin bioassay for multi-purpose compound screening)

|                                                                             |             |                                  |                                                                                       |                                                                           |                                     |
|-----------------------------------------------------------------------------|-------------|----------------------------------|---------------------------------------------------------------------------------------|---------------------------------------------------------------------------|-------------------------------------|
| Lasalocid Sodium                                                            | 25999-20-6  | Furan                            | Calcium ionophore; anti-bacterial, anti-parasitic activity; neurotoxin                | A: anti-parasitic, esp. Coccidiosis                                       | Anti-parasitic                      |
| N-Formylmethionyl-phenylalanine                                             | 22008-60-2  | Dipeptide                        | Neutrophil chemotaxis                                                                 | None                                                                      | None known                          |
| Pomiferin                                                                   | 572-03-2    | Isoflavone                       | Antioxidant; inhibitor of HDAC & AChE; blocks cancer proliferation                    | [H: cardioprotection; cancer, various]                                    | Cardiovascular, cancer              |
| Pyrvinium Pamoate, a/k/a Povon                                              | 3546-41-6   | Quinolinium                      | Kills parasitic worms                                                                 | H, V: anti-helminthic                                                     | Anti-parasitic                      |
| Tannic Acid                                                                 | 1401-55-4   | Polyphenol, tannin               | Antioxidant, astringent                                                               | H, V: wound care                                                          | Skin                                |
| <b>High-Potency Fascin-Pathway Enhancers with morphological effects (5)</b> |             |                                  |                                                                                       |                                                                           |                                     |
| Amlodipine Besylate                                                         | 111470-99-6 | Dihydropyridine                  | Blocks Ca <sup>2+</sup> channels; vasodilator                                         | H: hypertension; angina                                                   | Cardiovascular                      |
| Atorvastatin Calcium                                                        | 134523-03-8 | Pyrrole, statin                  | HMG-CoA reductase inhibitor                                                           | H: Hypercholesterolemia                                                   | Cardiovascular                      |
| Emetine Dichloride                                                          | 316-42-7    | Isoquinoline alkaloid            | Protein synthesis inhibitor (eukaryotic)                                              | H, V: induce emesis or catharsis; amebiasis; nematode infection           | Anti-parasitic                      |
| Rosolic Acid. a/k/a aurin, corallin                                         | 603-45-2    | Cyclohexane-carboxylic acid      | Colorimetric pH indicator; selective GR modulator                                     | None                                                                      | None known                          |
| Rosuvastatin                                                                | 287714-14-4 | Pyrrole, statin                  | HMG-CoA reductase inhibitor                                                           | H: Hypercholesterolemia                                                   | Cardiovascular                      |
| <b>Low-potency Fascin-Pathway Enhancers (11)</b>                            |             |                                  |                                                                                       |                                                                           |                                     |
| Acetylcysteine                                                              | 616-91-1    | Amino acid derivative            | Lowers mucus viscosity; blocks HIV effects; increases glutathione levels; antioxidant | H: pulmonary disease, e.g., cystic fibrosis; AIDS; acetaminophen overdose | Pulmonary, Anti-viral, Other        |
| Adiphenine Hydrochloride                                                    | 50-42-0     | Diphenylacetic acid              | nAChR blocker                                                                         | [Local anesthetic]                                                        | Other                               |
| Anisindione                                                                 | 117-37-3    | Aromatic Polycyclic Hydrocarbons | Anticoagulant                                                                         | H: thrombosis and/or embolism                                             | Cardio/Cerebrovascular              |
| Ceftriaxone Disodium                                                        | 104376-79-6 | Cephalosporin                    | Antibacterial, broad spectrum; neuroprotection                                        | H: numerous bacterial infections, including meningitis [ALS, stroke]      | Antibacterial, Cerebrovascular, CNS |
| Estradiol Acetate                                                           | 4245-41-4   | Steroid, reproductive            | Estrogen receptor agonist                                                             | H: hormone replacement therapy; with progestin for contraception          | Endocrine                           |
| Geneticin, a/k/a G418                                                       | 108321-42-2 | Aminoglycoside                   | Antibiotic                                                                            | [H, V: parasitic infections]; experimental                                | Anti-parasitic                      |
| Mechlorethamine                                                             | 51-75-2     | Nitrogen mustard                 | DNA alkylating agent; toxic to dividing cells                                         | H: Anti-neoplastic, esp. lymphoma                                         | Cancer                              |
| Metaraminol Bitartrate                                                      | 33402-03-8  | Phenylpropanolamine              | Adrenergic $\alpha$ -agonist; vasoconstriction                                        | H: Hypotension; shock                                                     | Cardiovascular                      |

**Table S2. Fascin-pathway enhancers, cont.** (Kraft et al., A cell-based fascin bioassay for multi-purpose compound screening)

|                                                                             |             |                                           |                                                                       |                                                                         |                                    |
|-----------------------------------------------------------------------------|-------------|-------------------------------------------|-----------------------------------------------------------------------|-------------------------------------------------------------------------|------------------------------------|
| Prednisolone                                                                | 50-24-8     | Glucocorticoid                            | Anti-inflammatory; immunosuppression                                  | H: Arthritis, dermatitis, other -itis; autoimmune dz; allergies/asthma, | Anti-inflammatory, Pulmonary, Skin |
| Spaglumeric Acid (NAAG)                                                     | 4910-46-7   | Dipeptide (endogenous neuropeptide)       | Histamine H1-antagonist; glutamate agonist?                           | H: Allergic rhinitis, conjunctivitis                                    | Other                              |
| Tolbutamide                                                                 | 64-77-7     | Sulphonylurea                             | Insulin release; hypoglycemia                                         | H: type 2 diabetes mellitus                                             | Diabetes                           |
| <b>Low-potency Fascin-Pathway Enhancers With morphological effects (13)</b> |             |                                           |                                                                       |                                                                         |                                    |
| Acetylcholine                                                               | 51-84-3     | Biogenic amine                            | Neurotransmitter                                                      | H: OTC homeopathic remedy                                               | Other                              |
| Apigenin                                                                    | 520-36-5    | Flavone                                   | Cell cycle arrest, apoptosis of tumor cells                           | [H: cancer prevention, treatment]                                       | Cancer                             |
| Benzyl Isothiocyanate                                                       | 622-78-6    | Isothiocyanate; dietary phytochemical     | Kills soil worms & fungi; apoptosis of cancer cells                   | A: biofumigant; [H: cancer prevention]                                  | Antimicrobial, Cancer              |
| Bithionol                                                                   | 97-18-7     | Bithionol                                 | Anti-infective; photosensitizer                                       | V: flatworm infestations                                                | Anti-parasitic                     |
| Caffeine                                                                    | 58-08-2     | Methylxanthine                            | CNS stimulant; inhibits phosphodiesterase; blocks adenosine R         | H: fatigue; migraine headache; apnea of prematurity                     | CNS                                |
| Cefditorin Pivoxil                                                          | 117467-28-4 | Cephalosporin, 3 <sup>rd</sup> generation | Anti-bacterial                                                        | H: bacterial infections, e.g., pneumonia                                | Antibacterial                      |
| Ciclopirox Olamine                                                          | 41621-49-2  | Pyridone                                  | Antifungal, antibacterial                                             | H: skin, nail fungal infections                                         | Antibacterial, Antifungal, Skin    |
| Cloxyquin [fascin blocker @ 10uM]                                           | 130-16-5    | Chloroquinololol                          | Antibacterial, antifungal                                             | [H: tuberculosis, incl. multidrug resistant]                            | Antibacterial, Antifungal          |
| Dyclonine Hydrochloride                                                     | 536-43-6    | Propiophenone                             | Na <sup>+</sup> channel blocker; local anesthetic                     | H: sore throat                                                          | Other                              |
| Hydroxytacrine (a/k/a Velnacrine) Maleate,                                  | 118909-22-1 | Aminoacridine                             | Cholinesterase inhibitor, centrally acting                            | [H: Alzheimer's dz]                                                     | CNS                                |
| Oxaprozin                                                                   | 21256-18-8  | Phenylpropene                             | COX inhibitor; NSAID; antipyretic                                     | H: arthritis, osteo- and rheumatioid                                    | Anti-inflammatory                  |
| Oxcarbazepine                                                               | 28721-07-5  | Dibenzazepine                             | Anticonvulsant; Na <sup>+</sup> channel blocker                       | H: partial seizures (adults & children)                                 | CNS                                |
| Thiothixene                                                                 | 5591-45-7   | Thioxanthene                              | Antagonist of dopamine, serotonin, adrenergic, & muscarinic receptors | H: psychosis                                                            | CNS                                |

**Abbreviations:**

AChE, acetylcholinesterase; AIDS, adult immunodeficiency syndrome; a/k/a, also known as; dz, disease; esp., especially; GR, glucocorticoid receptor; HDAC, histone deacetylase; HMG-CoA, hydroxymethylglutaryl-coenzyme A; HRT, hormone replacement therapy; Na<sup>+</sup>, sodium ion; nAChR, nicotinic acetylcholine receptor; NMDA, N-methyl-D-aspartate; NSAID, nonsteroidal anti-inflammatory drug; OC, oral contraceptive; OTC, over-the-counter; Pin1, peptidylprolyl cis-trans isomerase, NIMA-interacting; R, receptor(s); Rx, treatment



**Table S3. Fascin-pathway blockers (filagree increasers) identified in the fascin bioassay.**

Each section is arranged in alphabetical order by compound name. Abbreviations on last page.

<sup>1</sup> A: agricultural/aquacultural use; H: human medical use; I: industrial use; V: veterinary medical use;

T: traditional/folk medical use; [possible uses, shown in brackets, are based on available data].

<sup>2</sup> Cytotoxicity: apparent cell death or neurodegeneration.

| Activity Class<br>Compound Name                                                                   | CAS #      | Chemical Class               | Pharmacological Effects                                     | Therapeutic and other Uses <sup>1</sup>                                              | Therapeutic Class (see Fig. 3D)     |
|---------------------------------------------------------------------------------------------------|------------|------------------------------|-------------------------------------------------------------|--------------------------------------------------------------------------------------|-------------------------------------|
| <b>High-Potency Fascin-Pathway Blockers with no cytotoxicity or morphological effects (n = 5)</b> |            |                              |                                                             |                                                                                      |                                     |
| Diflunisal                                                                                        | 22494-42-4 | Salicylate                   | COX inhibitor; NSAID                                        | H: pain, arthritis                                                                   | Analgesic, anti-inflammatory        |
| Imipramine HCl                                                                                    | 113-52-0   | Tricyclic                    | NE uptake inhibitor                                         | H: depression; enuresis                                                              | CNS                                 |
| Nifedipine                                                                                        | 21829-25-4 | Dihydropyridine              | Blocks Ca <sup>2+</sup> channels; vasodilation              | H: angina, hypertension                                                              | Cardiovascular                      |
| Spiperone                                                                                         | 749-02-0   | Buterophenone                | Dopamine D2 receptor antagonist                             | H: psychosis                                                                         | CNS                                 |
| Suprofen                                                                                          | 40828-46-4 | Phenylpropionate             | COX inhibitor; NSAID; inhibits pupillary constriction       | H: cataract surgery                                                                  | Analgesic, anti-inflammatory; Other |
| <b>High-Potency Filagree Increasers with cytotoxicity<sup>2</sup> at high dose (n = 1)</b>        |            |                              |                                                             |                                                                                      |                                     |
| Broxyquinoline                                                                                    | 521-74-4   | Hydroxyquinoline             | Intestinal antiseptic                                       | H: amoebic dysentery & other diarrheas                                               | Antiparasitic                       |
| <b>High-Potency Fascin-Pathway Blockers with morphological effects (n = 6)</b>                    |            |                              |                                                             |                                                                                      |                                     |
| 4'-Demethyl-epipodophyllotoxin                                                                    | N/A        | Tetrahydronaphthalene        | Blocks IGF1 receptor autophosphorylation                    | [H: cancers, various types]                                                          |                                     |
| Azadirachtin                                                                                      | 11141-17-6 | Triterpene                   | Blocks development & reproduction (insects)                 | A: broad-spectrum insecticide                                                        | Other                               |
| Cloxyquin                                                                                         | 130-16-5   | Hydroxyquinoline             | Anti-bacterial, anti-fungal                                 | [H: tuberculosis]                                                                    | Antibacterial, Antifungal           |
| Colchiceine, a/k/a demethylcolchicine                                                             | 477-27-0   | Colchicine alkaloid          | Blocks MT formation                                         | None known                                                                           | None known                          |
| Colchicine                                                                                        | 64-86-8    | Colchicine alkaloid          | Blocks MT formation, WBC motility, urate crystal deposition | H: gout; Familial Mediterranean Fever                                                | Other; Anti-inflammatory            |
| Picropodophyllotoxin (picropodophyllin)                                                           | 477-47-4   | Tetrahydronaphthalene        | Blocks IGF1 receptor autophosphorylation                    | [H: cancer, various types]                                                           | Cancer                              |
| <b>Low-potency Fascin-Pathway Blockers (n = 17)</b>                                               |            |                              |                                                             |                                                                                      |                                     |
| Acetyltryptophan                                                                                  | 1218-34-4  | Modified aromatic amino acid | Protease inhibitor?                                         | None known                                                                           | None known                          |
| Amantadine HCl                                                                                    | 665-66-7   | Adamantane                   | NMDA antagonist; anti-viral activity                        | H: influenza A; Parkinson's dz; dyskinesia; post-herpetic neuralgia [H: hepatitis C] | Anti-viral; CNS                     |

**Table S3. Fascin-pathway blockers, cont.** (Kraft et al., A cell-based fascin bioassay for multi-purpose compound screening)

|                                                                               |             |                             |                                                                |                                                       |                              |
|-------------------------------------------------------------------------------|-------------|-----------------------------|----------------------------------------------------------------|-------------------------------------------------------|------------------------------|
| Aminolevulinic Acid HCl                                                       | 5451-09-2   | Modified amino acid         | Photosensitizer                                                | H: actinic keratosis                                  | Skin                         |
| Econazol Nitrate                                                              | 68797-31-9  | Imidazole                   | Anti-fungal agent                                              | H: superficial fungal infections                      | Anti-fungal                  |
| Griseofulvin                                                                  | 126-07-8    | Benzofuran                  | Anti-fungal agent                                              | H: superficial fungal infections                      | Anti-fungal                  |
| Hydroflumethiazide                                                            | 135-09-1    | Sulfonamide                 | NaCl symporter inhibitor; diuretic                             | H: hypertension                                       | Cardiovascular               |
| Metoprolol Tartrate                                                           | 56392-17-7  | Phenoxypropanolamine        | $\beta$ 1-adrenergic receptor antagonist                       | H: hypertension, cardiac arrhythmia                   | Cardiovascular               |
| Naproxen(+)                                                                   | 22204-53-1  | Naphthalene                 | COX inhibitor; NSAID                                           | H: pain, gout, arthritis                              | Analgesic, anti-inflammatory |
| Oxybenzone                                                                    | 131-57-7    | Benzophenone                | Absorbs UV radiation                                           | H: sunscreen                                          | Skin                         |
| Propylthiouracil                                                              | 51-52-5     | Thiourea                    | Inhibits thyroid hormone synthesis                             | H: Graves dz and other hyperthyroidism                | Endocrine                    |
| Salicin                                                                       | 138-52-3    | Glucoside, benzyl alcohol   | COX inhibitor; NSAID                                           | T: inflammation; H: <i>prev.</i> rheumatoid arthritis | Anti-inflammatory            |
| Sarafloxacin HCl                                                              | 91296-87-6  | Fluoroquinolone             | Anti-bacterial, broad spectrum                                 | A: bacterial infections                               | Antibacterial                |
| S-Nitroso-N-Acetylpenicillamine (SNAP)                                        | 79032-48-7  | S-Nitrosothiol              | Spontaneous NO donor, vasodilator; cysteine protease inhibitor | None known; research reagent                          | None known                   |
| Sulfamethoxazole                                                              | 723-46-6    | Sulfonamide (sulfanilamine) | Blocks folic acid synthesis                                    | H: bacterial infection, various                       | Antibacterial                |
| Telenzepine HCl                                                               | 80880-90-6  | Benzodiazepine              | M1 mAChR antagonist; parasympatholytic                         | [H: <i>peptic ulcer; weight loss</i> ]                | Ulcer                        |
| Triadimefon                                                                   | 43121-43-3  | Triazole                    | Anti-fungal; blocks cell wall synthesis                        | I, A: fungicide; teratogenic in vertebrate animals    | Anti-fungal                  |
| Vinburnine                                                                    | 4880-88-0   | Indole alkaloid (Vinca)     | Vasodilation                                                   | [H: <i>stroke</i> ]                                   | Cerebrovascular              |
| <b>Low-potency Fascin-Pathway Blockers with morphological effects (n = 5)</b> |             |                             |                                                                |                                                       |                              |
| Baclofen                                                                      | 1134-47-0   | Butyric acid                | GABA agonist                                                   | H: spasticity                                         | CNS                          |
| Citrinin                                                                      | 518-75-2    | Benzopyran                  | Mitochondrial dysfunction                                      | None known; associated with fungal contaminated food  | None known                   |
| Iopanoic Acid                                                                 | 96-83-3     | Iodobenzene                 | Blocks deiodinase activity & thyroid hormone release           | H: oral contrast agent, thyrotoxicosis                | Endocrine                    |
| Nateglinide                                                                   | 105816-04-4 | Cyclohexane                 | Stimulates insulin release                                     | H: type 2 diabetes mellitus                           | Diabetes                     |
| Paclitaxel                                                                    | 33069-62-4  | Taxoid cyclodecane          | Tubulin stabilizer; anti-mitotic agent                         | H: cancer, various                                    | Cancer                       |

**Abbreviations:**

COX, cyclooxygenase; dz, disease; GABA, gamma amino butyric acid; HCl, hydrochloride; IGF1, insulin-like growth factor; mAChR, muscarinic acetylcholine receptor; MT, microtubule; NaCl, sodium chloride; NE, norepinephrine; NMDA, *N*-methyl-D-aspartic acid; NO, nitric oxide; NSAID; non-steroidal anti-inflammatory drug; *prev.*, previously; UV, ultraviolet; WBC, white blood cell(s)
